# Supplementary material for: Arsenolipids are not uniformly distributed within two brown macroalgal species Saccharina latissima and Alaria esculenta
Source: PubMed Central journal article supplement (PMC6611760; doi:10.1007/s00216-019-01907-x), 2019-05-31
Supplement: 216_2019_1907_MOESM1_ESM.pdf [file 216_2019_1907_MOESM1_ESM.pdf]

## **Analytical and Bioanalytical Chemistry**

### **Electronic Supplementary Material**

#### **Arsenolipids are not uniformly distributed within two brown macroalgal species *Saccharina latissima* and *Alaria esculenta***

Ásta. H. Pétursdóttir, Jonathan Blagden, Karl Gunnarsson, Andrea Raab, Dagmar Stengel, Jörg Feldmann, Helga Gunnlaugsdóttir

## Contents

|                                                               |    |
|---------------------------------------------------------------|----|
| Quantification batch A .....                                  | 3  |
| Identification batch A.....                                   | 4  |
| Identification batch b.....                                   | 7  |
| Minor traces .....                                            | 7  |
| MSMS data from Excalibur .....                                | 11 |
| Instability of AsPLs? .....                                   | 17 |
| Comparison of the two extractions of the (same) samples ..... | 18 |
| <i>Alaria esculenta</i> .....                                 | 18 |
| <i>Saccharina latissima</i> .....                             | 20 |
| Arsenosugars .....                                            | 22 |

### Information:

Batch A: Samples prepared and measured at Matís, Iceland (ICPMS). Shipped to Abdn for identification (ESI-MS). Identification not fully conclusive.

Batch B: Samples prepared again (there was still enough material for another analysis). Samples prepared at Matís, shipped dry (under N<sub>2</sub>). Re-dissolved and measured at Abdn with parallel ICP-MS/ESI-MS.

Raw data: The identification data (.raw) is found in open data repository Zenodo at

[https://urldefense.proofpoint.com/v2/url?u=https-3A zenodo.org communities sos &d=DwIGaQ&c=vh6FgFnduejNhPPD0fl\\_yRaSfZy8CWbWnIf4XJhSqx8&r=1I2nPFBwmKsJcsgWdEIXRA&m=dYSZ1Wajh7IilAyUK0bJHw-FdAzs8XhXMQKaf0voNMY&s=AGqvNjN3hmC6M93Hoor42aNTC8YxY3t7SLGdknhZSjQ&e=](https://urldefense.proofpoint.com/v2/url?u=https-3A%2Fzenodo.org%2Fcommunities%2Fsos%2F&d=DwIGaQ&c=vh6FgFnduejNhPPD0fl_yRaSfZy8CWbWnIf4XJhSqx8&r=1I2nPFBwmKsJcsgWdEIXRA&m=dYSZ1Wajh7IilAyUK0bJHw-FdAzs8XhXMQKaf0voNMY&s=AGqvNjN3hmC6M93Hoor42aNTC8YxY3t7SLGdknhZSjQ&e=)

DOI for the identification data is [10.5281/zenodo.2671494](https://doi.org/10.5281/zenodo.2671494).

## Quantification batch A

**Table S1** Quantification of AsLs in *Saccharina latissima* and *Alaria esculenta* (mg kg<sup>-1</sup>), batch a), (n=2)

| Peak | Saccharina latissima |               |               |               |               |               | Alaria esculenta |               |               |               |               |               | Hijiki   |             |
|------|----------------------|---------------|---------------|---------------|---------------|---------------|------------------|---------------|---------------|---------------|---------------|---------------|----------|-------------|
|      | Rt (min)             | Stipe         | Holdfast      | Old frond     | Young frond   | Sori          | Rt (min)         | Stipe         | Holdfast      | Midrib        | Frond         | Sporophyll    | Rt (min) |             |
| A    | 3.1                  | 0.68 ± 0.07   | 2.25 ± 0.01   | 4.1 ± 0.6     | 4.1 ± 0.5     | 5.9 ± 0.1     | 3.1              | 2.4 ± 0.1     | 5.2 ± 0.1     | 1.09 ± 0.08   | 1.67 ± 0.02   | 5.3 ± 0.5     | 3.2      | 0.44 ± 0.04 |
| B    | 16.6                 | 0.012 ± 0.002 | 0.019 ± 0.001 | 0.035 ± 0.001 | 0.020 ± 0.001 | 0.051 ± 0.002 | 16.5             | 0.010 ± 0.001 | 0.054 ± 0.001 | 0.012 ± 0.001 | 0.035 ± 0.002 | 0.036 ± 0.001 | 17.0     | 0.26 ± 0.02 |
| C    | 20.2                 | 0.040 ± 0.001 | 0.030 ± 0.004 | 0.119 ± 0.004 | 0.08 ± 0.01   | 0.14 ± 0.03   | 21.3             | 0.02          | 0.013 ± 0.001 | 0.029 ± 0.002 | 0.079 ± 0.003 | 0.092 ± 0.001 | 20.9     | 1.11 ± 0.05 |
| D    | 24.7                 | 0.061 ± 0.02  | 0.076 ± 0.001 | 0.09 ± 0.03   | 0.134 ± 0.004 | 0.13 ± 0.01   | 24.7             | 0.041 ± 0.001 | 0.061 ± 0.001 | 0.056 ± 0.006 | 0.025 ± 0.001 | 0.066 ± 0.001 | 23.4     | 0.15        |
| E    | 26.3                 | 0.44 ± 0.02   | 0.57 ± 0.03   | 1.00 ± 0.04   | 1.22 ± 0.01   | 1.28 ± 0.01   | 26.4             | 0.35 ± 0.01   | 0.49 ± 0.01   | 0.60 ± 0.05   | 0.318 ± 0.004 | 0.70 ± 0.04   | 26.2     | 0.26 ± 0.03 |
| F    | 28.3                 | 0.48 ± 0.02   | 0.74 ± 0.07   | 1.25 ± 0.06   | 2.15 ± 0.04   | 2.17 ± 0.05   | 28.5             | 0.34 ± 0.01   | 0.70 ± 0.04   | 1.1 ± 0.1     | 0.80 ± 0.04   | 1.6 ± 0.2     | 28.0     | 3.2 ± 0.04  |
| G    | 31.2                 | 0.52 ± 0.02   | 0.64 ± 0.05   | 0.83 ± 0.05   | 1.62 ± 0.05   | 1.43 ± 0.06   | 31.5             | 0.21 ± 0.02   | 0.24 ± 0.01   | 0.30 ± 0.03   | 0.15 ± 0.03   | 0.34 ± 0.06   | 30.7     | 0.40 ± 0.07 |
| H    | 35.1                 | 0.22 ± 0.02   | 0.25 ± 0.02   | 0.30 ± 0.01   | 0.43 ± 0.03   | 0.52 ± 0.02   | 35.4             | 0.07 ± 0.01   | 0.090 ± 0.007 | 0.07 ± 0.01   | 0.074 ± 0.02  | 0.15 ± 0.03   | 34.6     | 0.24 ± 0.06 |
| I    |                      |               |               |               |               |               |                  |               |               |               |               |               | 40.2     | 0.12 ± 0.02 |
| Sum  |                      | 2.5           | 4.6           | 7.7           | 9.8           | 11.6          |                  | 3.5           | 6.8           | 3.3           | 3.2           | 8.3           |          | 6.1         |

## Identification batch A

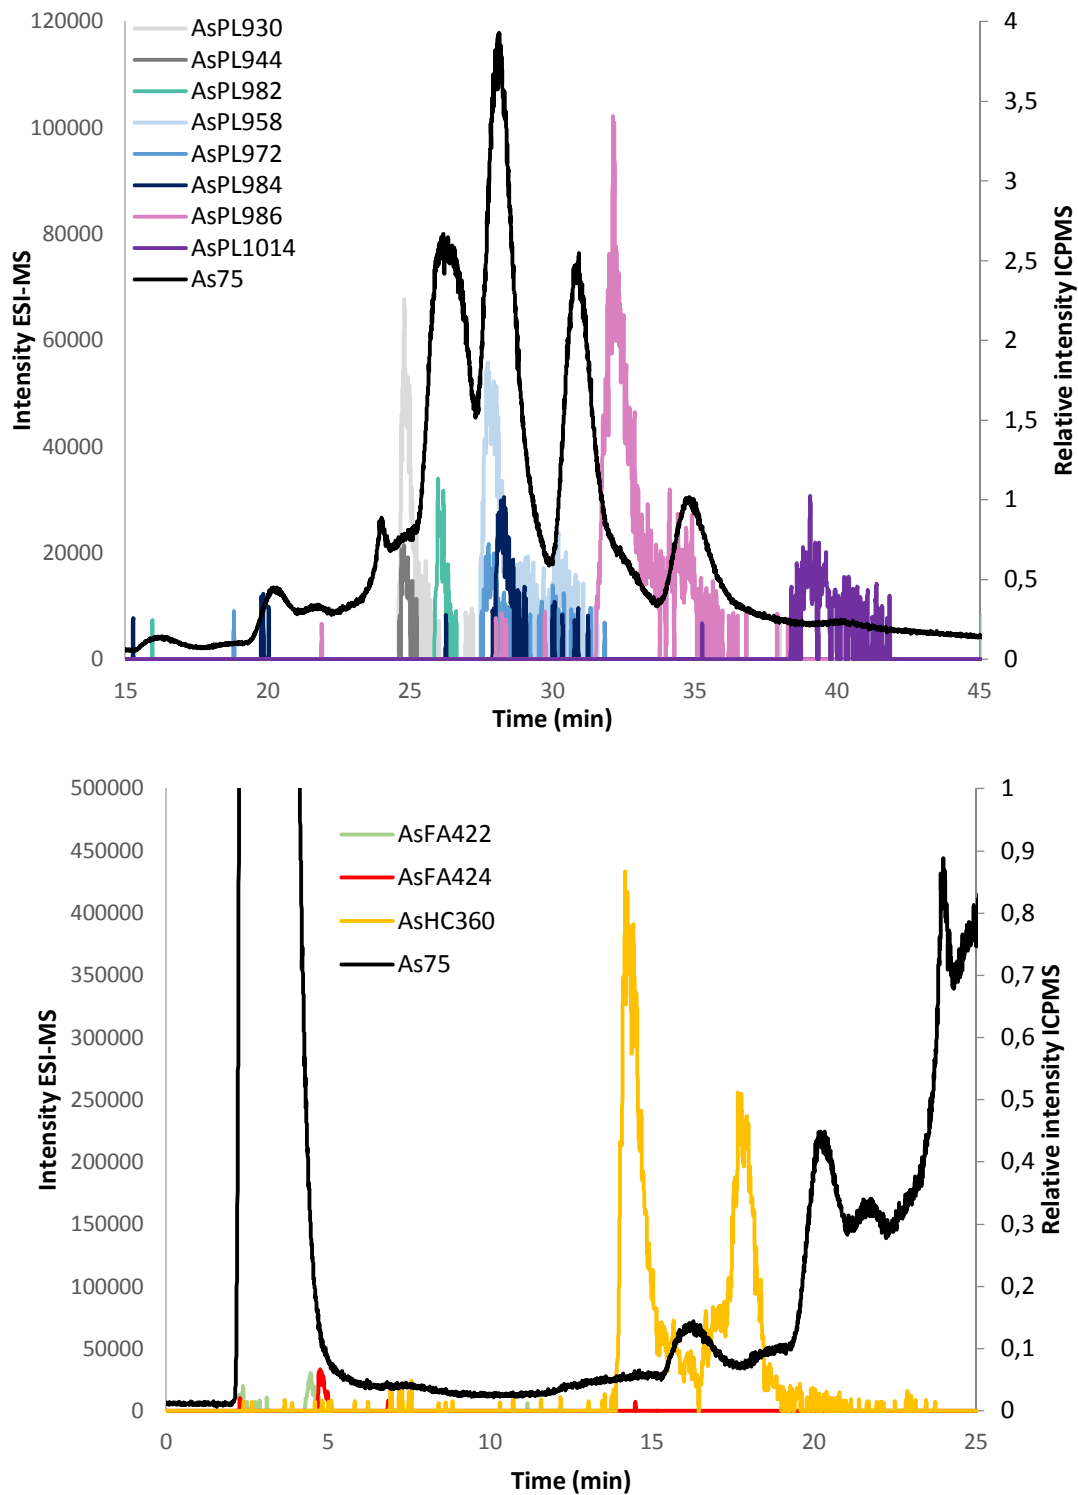

**Fig. S1** Example chromatogram for batch A of elution of identified peaks. *S. latissima* old frond. As75 analysed at Matis (ICPMS) and other m/z analysed at University of Aberdeen a week later (ESI-MS). Same type of column, but not the exact same column

The elution order of species is the same with ESI-MS and ICPMS, but the retention times have shifted due to using columns of different batches and slightly different length of connections between instruments. Peak allocation was made by comparison to Hijiki CRM that was analysed in the same

run and which is reported in Glabonjat et al [1] as well as comparison to batch B. When batch A was analysed the intensity for AsHC360 was much higher than for the AsPLs, whereas this was not the case for batch B. This may have to do with the AsPLs possibly being less stable than the AsHCs (the identification was carried out a week later than quantification). The AsFAs elute in the void volume since the starting gradient was at 70% MeOH. The separation is worse than at Abdn (figure 3 in manuscript), even though this gradient program showed the best separation after optimisation of gradient programs. Problems with separation may be attributed to the specific column, but since other C18 and C8 columns also showed poor separation (where in one case the exact same column had worked in other laboratories) it was possible the fault was e.g. with the HPLC, i.e. the mixing of the gradient solvents was somehow different leading to poorer results. The HPLC was mainly used previously isocratically.

Split peak pattern for AsHC360 has e.g. been reported by Pétursdóttir et al [2].

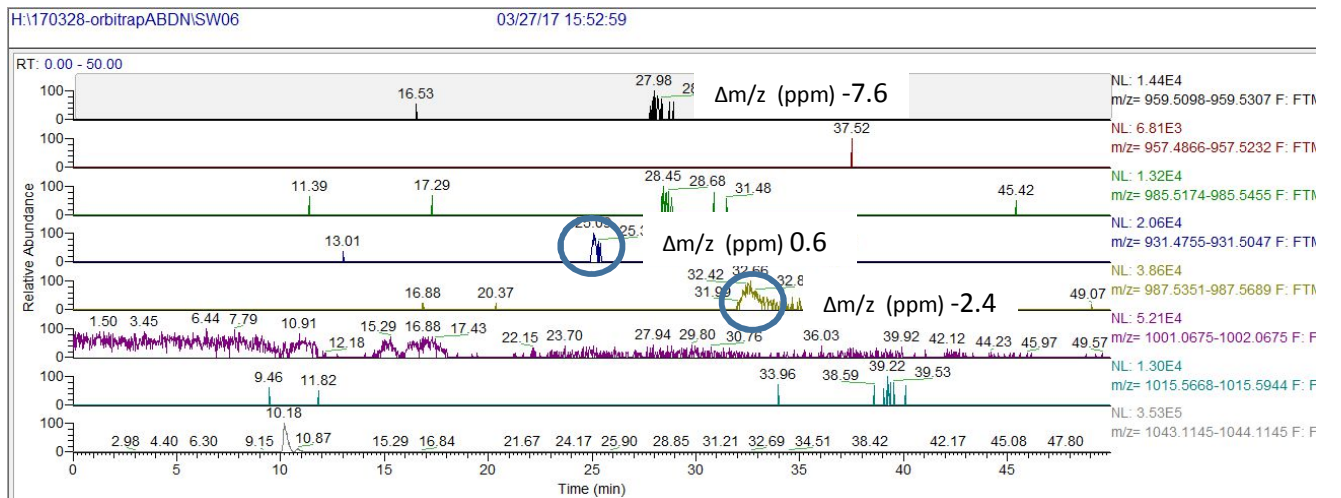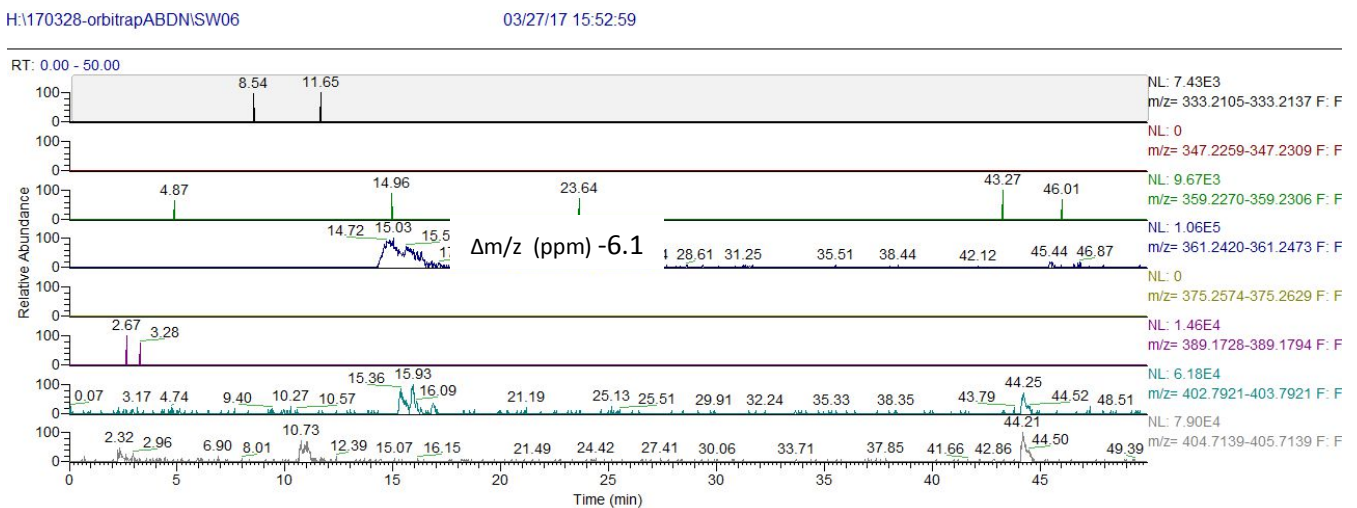

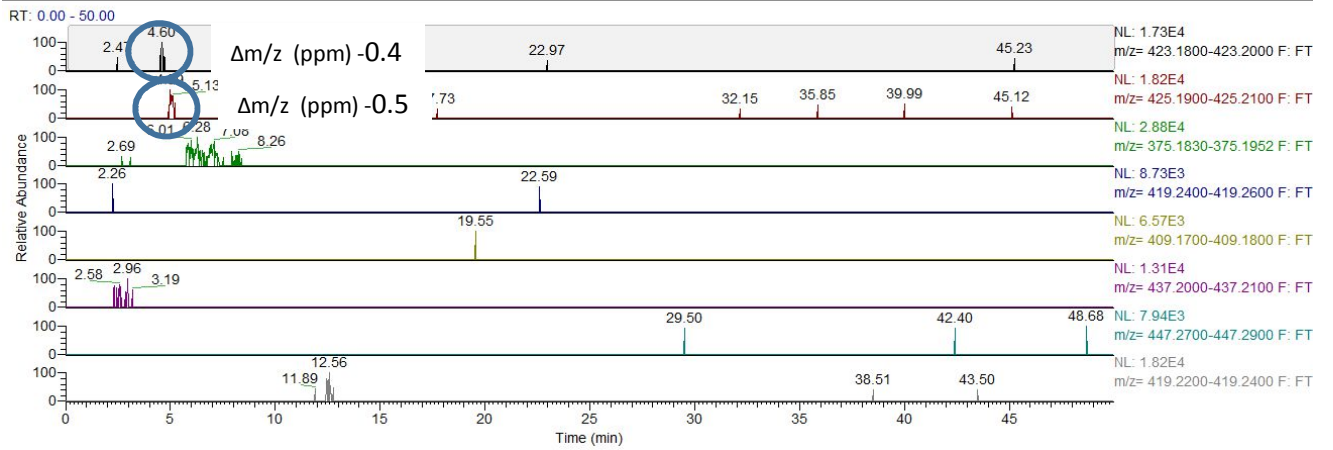

Fig. S2 Identified peaks in *S. latissima* stipe as seen in software. Batch a

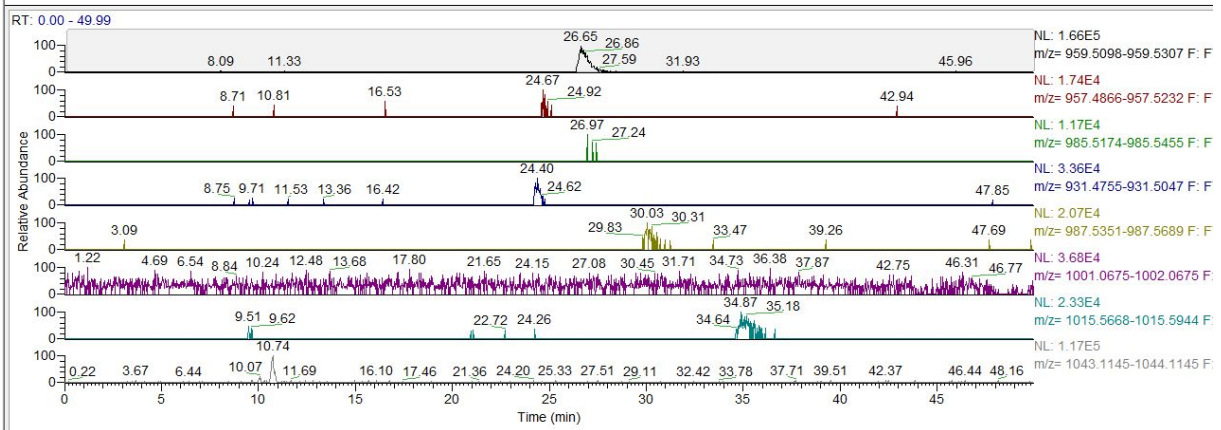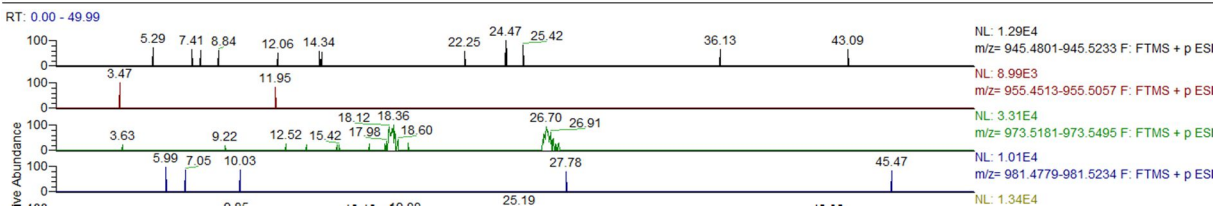

Fig. S3 Identified peaks in Hijiki as seen in software. Batch a

# Identification batch B

## Minor traces

**Table S2** Identification of AsL groups only as minor traces (batch b)

| Rt (min) | Short name | Mol formula MH+  | Alaria esculenta |       |           |        |        | Saccharina latissima |       |           |       | CRM       | Break down from? |         |
|----------|------------|------------------|------------------|-------|-----------|--------|--------|----------------------|-------|-----------|-------|-----------|------------------|---------|
|          |            |                  | Sporo-phyll      | Stipe | Hold-fast | Fronde | Midrib | Young frond          | Sori  | Hold-fast | Stipe | Old frond |                  | Hijiki  |
| 18-19    | AsFA422    | C22 H36 O3 As    |                  |       |           |        | 0.16   | -1.71                | 1.58  | -2.46     | -0.03 |           |                  |         |
|          | AsFA424    | C22 H38 O3 As    |                  |       |           |        |        | -1.49                | 4.70  |           | -0.90 | 3.12      |                  |         |
|          | AsFA374    | C18 H36 O3 As    |                  |       |           |        | 0.77   |                      |       |           |       |           |                  |         |
| 20-22    | AsPL692    | C27 H55 O13 As P | -1.47            |       | -1.83     |        | -0.33  | -1.29                | -1.65 | -0.33     | -2.09 | -0.59     |                  | AsPL930 |
|          | AsPL742    | C31 H57 O13 As P |                  |       |           |        |        |                      | -2.15 |           |       |           | AsPL958          |         |
|          | AsPL720    | C29 H59 O13 As P | -0.22            | -1.83 | -1.06     | -1.15  | -1.23  | -0.90                | -1.48 | -0.47     | -0.81 | -1.48     | -0.90            | AsPL972 |
|          | AsPL734    | C30 H61 O13 As P |                  |       |           |        |        |                      | 1.338 |           | 2.25  |           |                  | AsPL980 |
|          | AsPL746    | C31 H61 O13 As P |                  |       |           |        |        |                      | -0.24 | 1.32      |       | -2.86     |                  | AsPL982 |
|          | AsPL748    | C31 H63 O13 As P |                  |       |           |        |        |                      |       |           | -1.49 |           | -1.33            | AsPL984 |
| 23       | AsPL776    | C33 H67 O13 As P |                  |       |           |        |        |                      |       | -0.79     |       |           |                  |         |

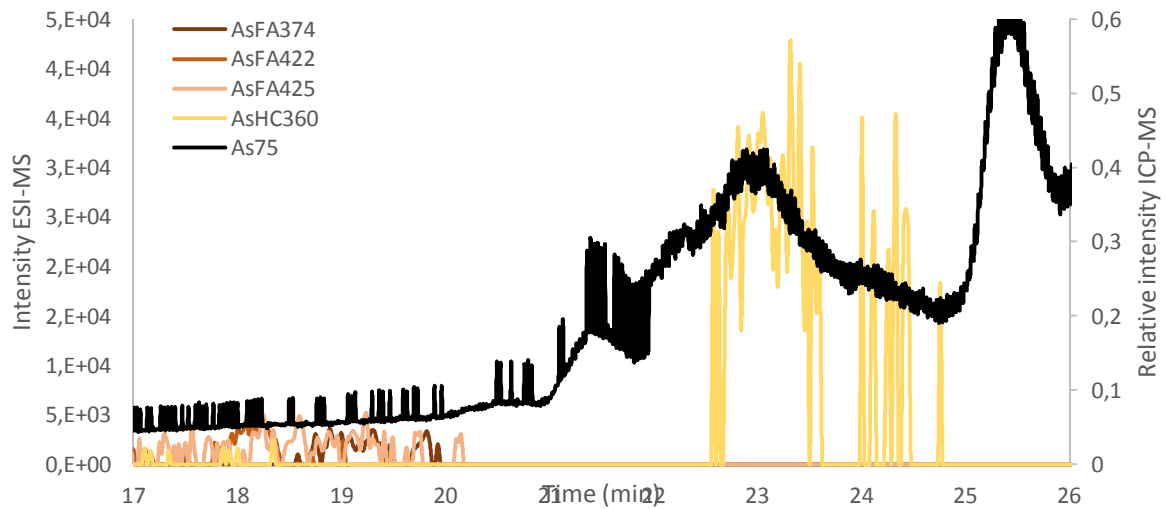

a) AsFAs and AsHC in AE

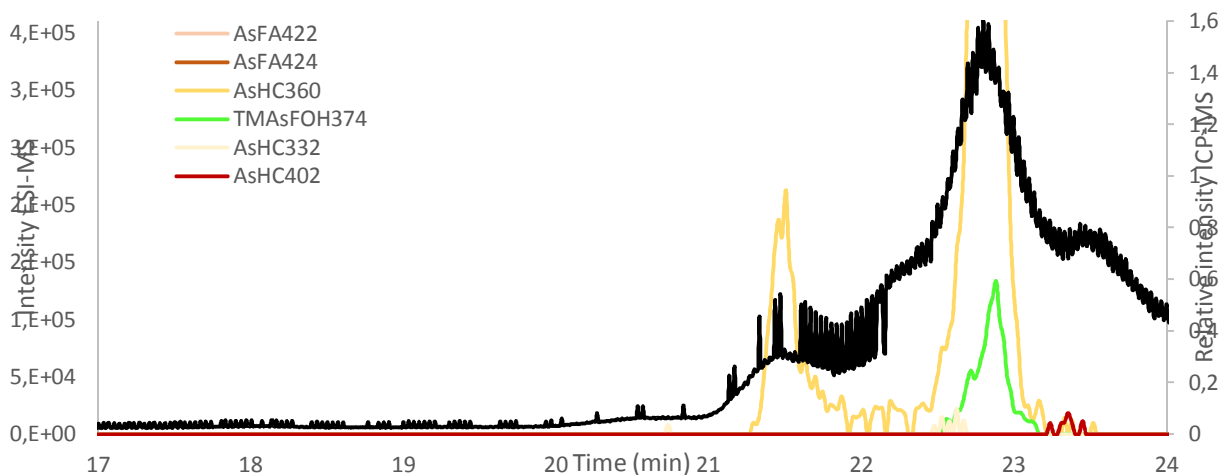

b) AsFAs and AsHC in SL

**Fig. S4** Minor traces

a)

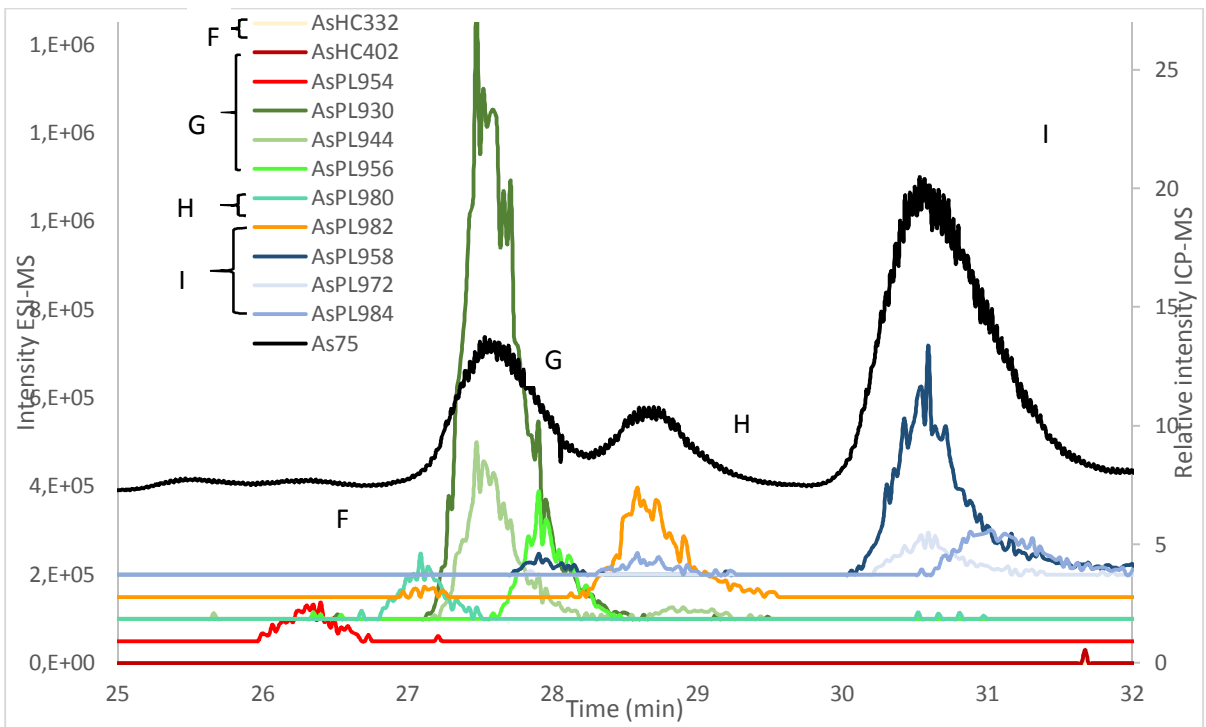

b)

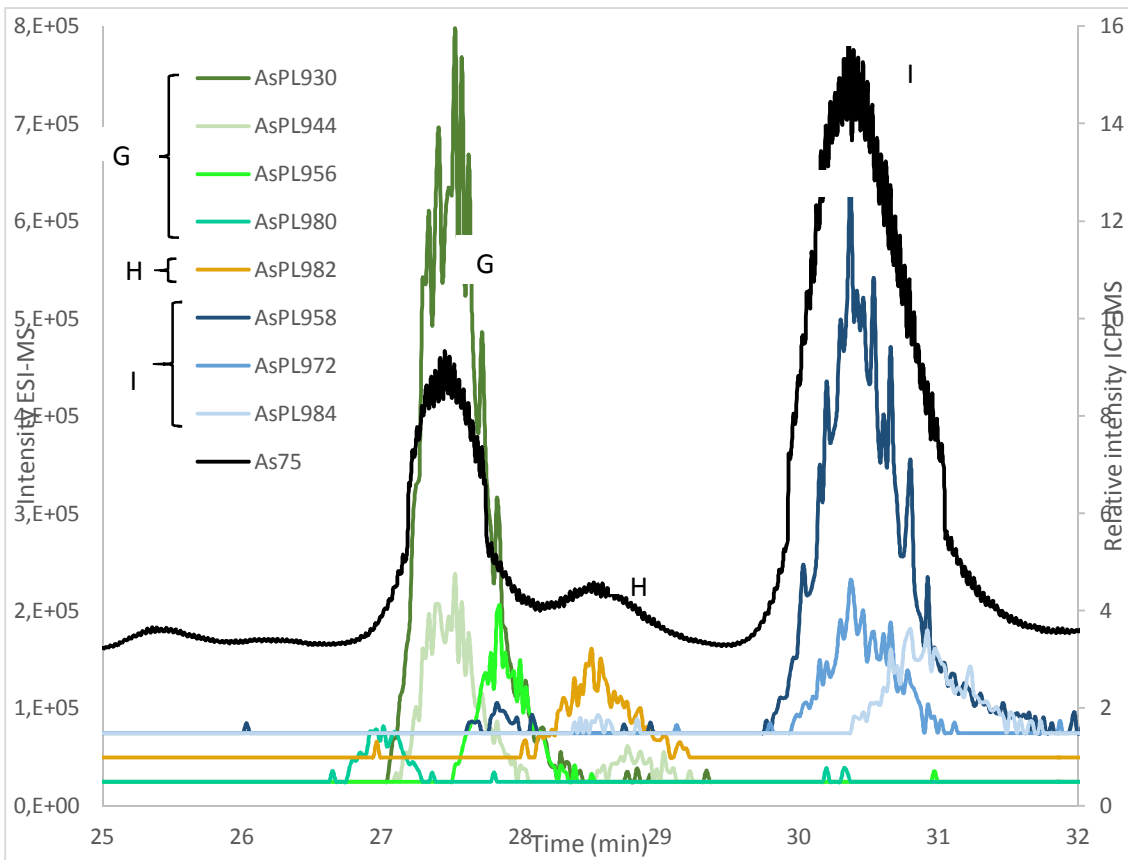



c)

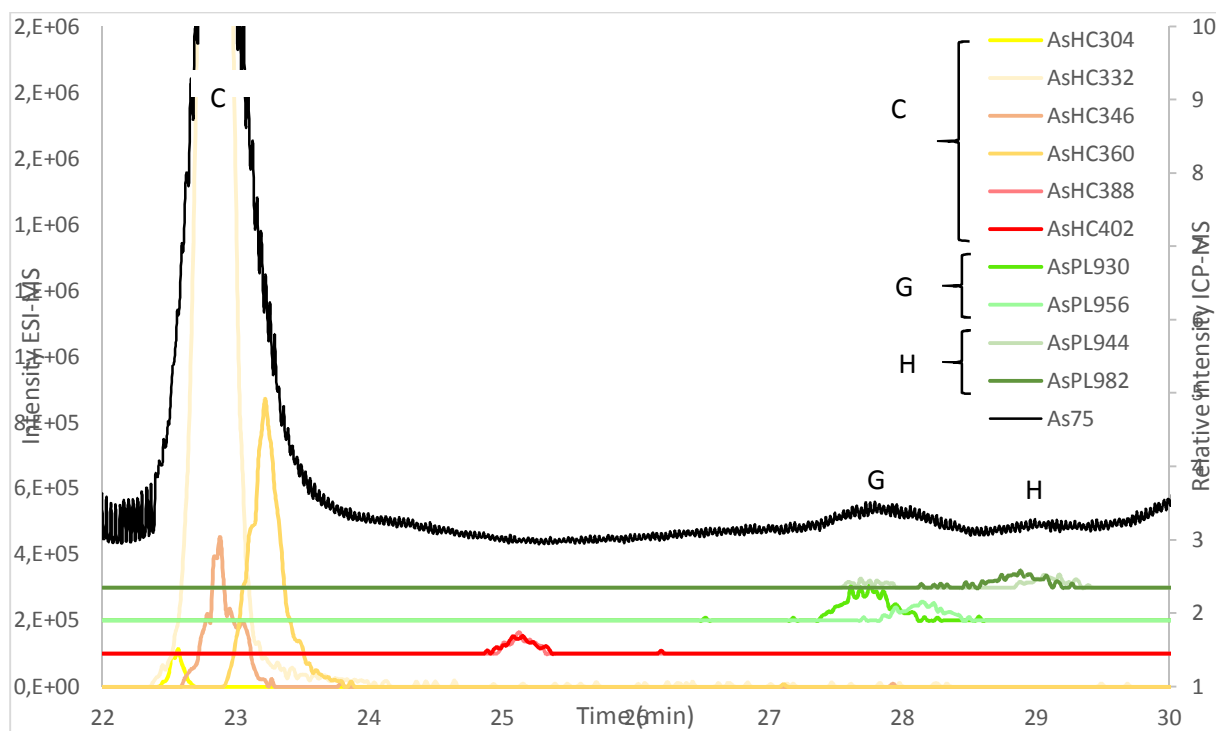

**Fig. S5** Overlay of ESI-MS data (coloured lines) and ICP-MS (black, m/z 75). Magnification of close-eluting peaks distinguished with ESI-MS. a) *Saccharina latissima* young frond b) *Alaria esculenta* midrib c) *Hijiki* CRM 7405a. There was a minor time delay for the ESI-MS data and to compensate this the ICP-MS signal was shifted to a 0.7-0.9 minute earlier retention time for all chromatographs

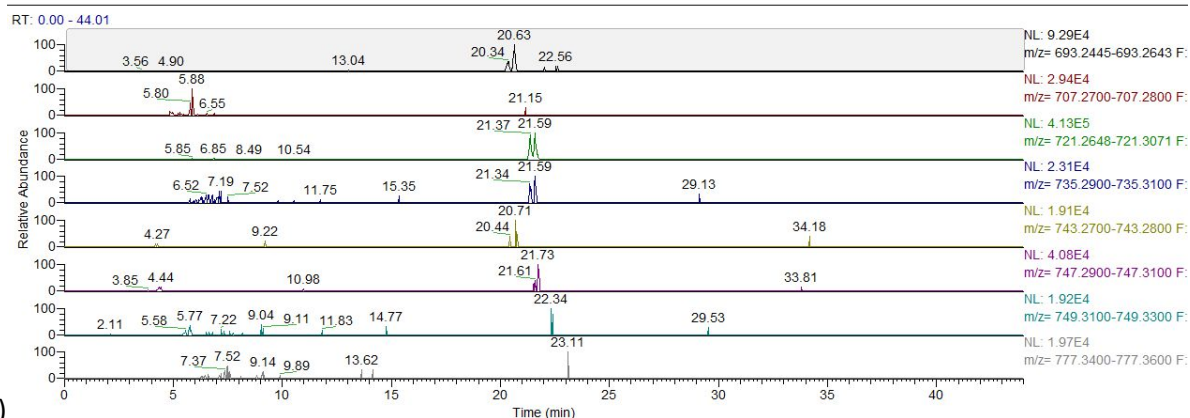

a)

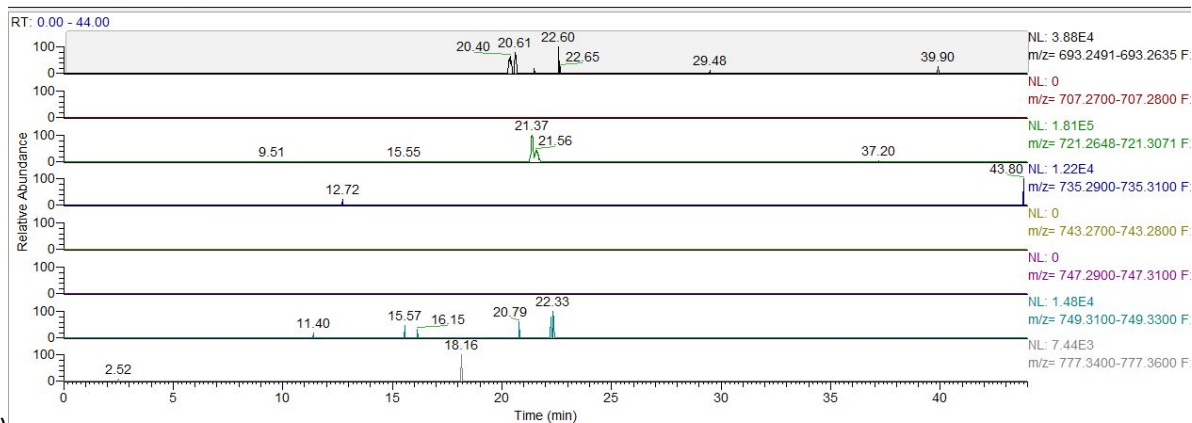

b)

**Fig. S6** Excalibur search for previously identified mono acyl AsPLs in *S.laticissima* a) sori b) young frond. Table S2 shows  $\Delta m/z$  for the identified species

MSMS data from Excalibur

Most common fragments for the AsLs were 391 and 409 (as described in Raab et al [3]).

**Table S3** Determined MSMS of the samples

| short name   | m+h    | MH+              | $\Delta m/z$ (ppm) | determined mass | short name    | m+h              | MH+              | $\Delta m/z$ (ppm) | determined mass  |
|--------------|--------|------------------|--------------------|-----------------|---------------|------------------|------------------|--------------------|------------------|
| AESP         | 931    | C10 H23 O10 As P | -0.614             | 409.02368       | SLYF          | 931              | C10 H23 O10 As P | -2.326             | 409.02298        |
|              | 959    | C10 H23 O10 As P | -16.8              | 409.01706       |               | 959              | C10 H23 O10 As P | 3.787              | 409.02548        |
|              |        | C17 H16 O6 As    | -28.5              | 391.00461       |               | 987              | C10 H23 O10 As P | -14.574            | 409.01797        |
| AES          | 931    | C10 H23 O10 As P | 0.731              | 409.02423       | SLSP          | 931              | C10 H23 O10 As P | 2.906              | 409.02512        |
|              |        | C17 H16 O6 As    | -6.614             | 391.01315       |               |                  | C17 H16 O6 As    | -1.448             | 391.01517        |
| AEHF         | 931    | C10 H23 O10 As P | -1.739             | 409.02322       |               | 959              | C10 H23 O10 As P | -1.885             | 409.02316        |
| AEF          | 959    | C10 H23 O10 As P | 3.42               | 409.02533       |               | 987              | C10 H23 O10 As   | -13.82             | 409.0183         |
| AEM          | 931    | C10 H23 O10 As P | -1.959             | 409.02313       |               | 931              | C10 H23 O10 As P | -3.377             | 409.02255        |
|              | 959    | C10 H23 O10 As P | -0.687             | 409.02365       |               | 957              | C10 H23 O10 As P | 0.877              | 409.02429        |
| AEM          | 931    | C10 H23 O10 As P | -1.054             | 409.0235        | SLHF          | 987              | C10 H23 O10 As P | 2.149              | 409.02481        |
|              |        | C17 H16 O6 As    | -1.371             | 391.0152        |               | 1001             | C11 H25 O10 As P | -0.216             | <b>423.03949</b> |
|              | 959    | C10 H23 O10 As P | -2.692             | 409.02283       |               | 1015             | C10 H23 O10 As P | -16.066            | 409.01736        |
|              | 987    | C10 H23 O10 As P | -9.709             | 409.01996       | SLS           | 931              | C10 H23 O10 As P | -3.744             | 409.0224         |
| Hijiki       | 959    | C10 H23 O10 As P | -1.128             | 409.02347       | 931           | C10 H23 O10 As P | -2.105           | 409.02307          |                  |
|              | 961    | C10 H23 O10 As P | -1.739             | 409.02322       | 959           | C10 H23 O10 As P | 3.347            | 409.0253           |                  |
|              | 987    | C10 H23 O10 As P | -0.614             | 409.02368       | SLOF          | 987              | C10 H23 O10 As P | -1.348             | 409.02338        |
|              |        | C2 H8 O As       | 3.473              | 122.97899       |               | 1001             | C11 H25 O10 As P | -1.303             | <b>423.03903</b> |
|              | 333    | C2 H4 As         | -2.119             | 102.95213       |               | 1015             | C10 H23 O10 As P | 0.437              | 409.02411        |
|              | Hijiki | 333              | C17 H38 O As       | 4.22            | 333.21472     | 931              | C10 H23 O10 As P | -0.467             | 409.02374        |
| C17 H38 O As |        |                  | -2.382             | 333.21252       | C17 H16 O6 As |                  | -3.008           | 391.01456          |                  |
| 333          |        | C2 H8 O As       | -1.893             | 122.97833       | SLOF          | 959              | C10 H23 O10 As P | -3.964             | 409.02231        |
|              |        | C2 H6 As         | -4.841             | 104.96749       |               | 987              | C11 H25 O10 As P | -11.964            | 423.03452        |
| C2 H4 As     |        | -6.49            | 102.95168          | 1001            |               | C18 H21 O5 As P  | -0.681           | 423.03342          |                  |
| 959          |        | C10 H23 O10 As P | -2.105             | 409.02307       | SLOF          | 931              | C10 H23 O10 As P | -3.744             | 409.0224         |
|              |        | C10 H21 O9 As P  | 1.006              | 391.01376       |               | 959              | C10 H23 O10 As P | 0.657              | 409.0242         |
|              |        | 961              | C10 H23 O10 As P   | 0.804           |               | 409.02426        | 987              | C10 H23 O10 As P   | 0.951            |
|              | 987    | C10 H23 O10 As P | -4.795             | 409.02197       |               | 1001             | C11 H25 O10 As P | -0.854             | 423.03922        |

AE= Alaria esculenta, SL = S. latissima. S=stipe. SP=sporophyll, sori. HF=Holdfast. M=midrib (new stipe). F=Frond. YF= young frond. OF= old frond.

smpl\_1\_171129044253 #1939 RT: 30.43 AV: 1 NL: 6.07E4  
F: FTMS + c ESI d w Full ms2 959.52@cid35.00 [250.00-970.00]

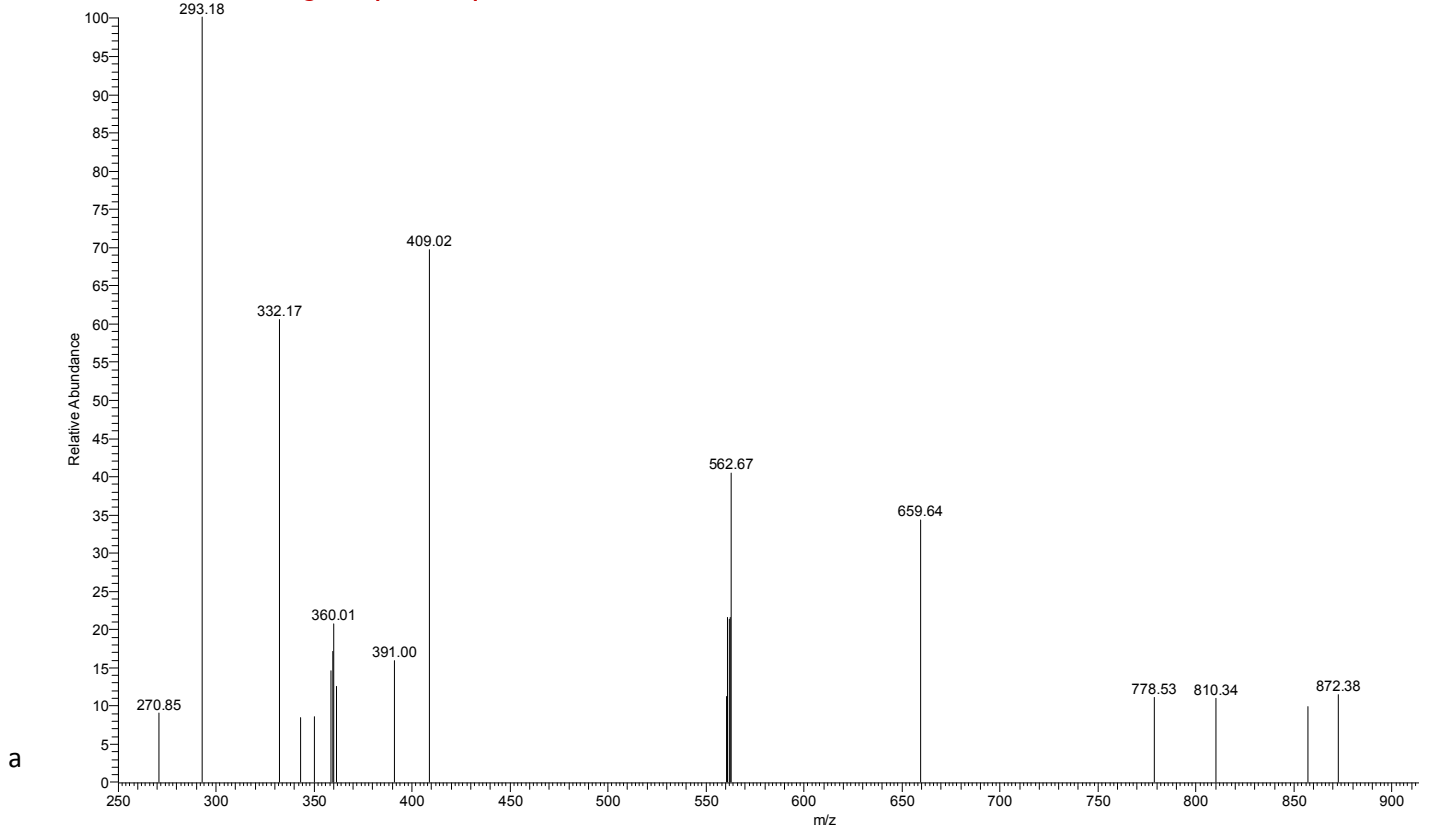

smpl\_12 #2684 RT: 35.04 AV: 1 NL: 6.61E4  
F: FTMS + c ESI d w Full ms2 1001.57@cid35.00 [265.00-1015.00]

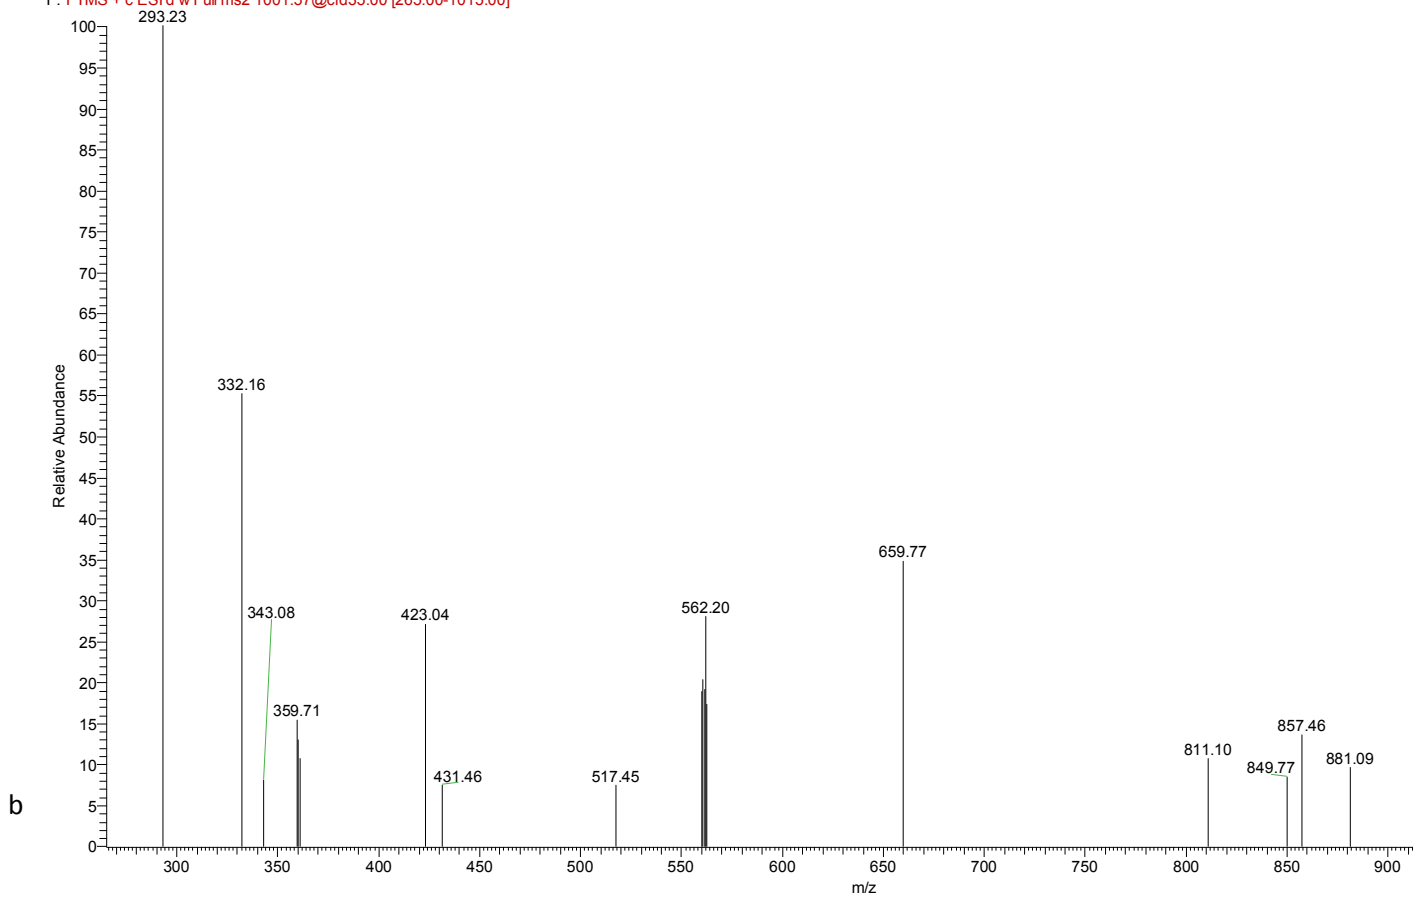

smpl\_12 #2066 RT: 27.75 AV: 1 NL: 1.11E5  
F: FTMS + c ESI d w Full ms2 931.49@cid35.00 [245.00-945.00]

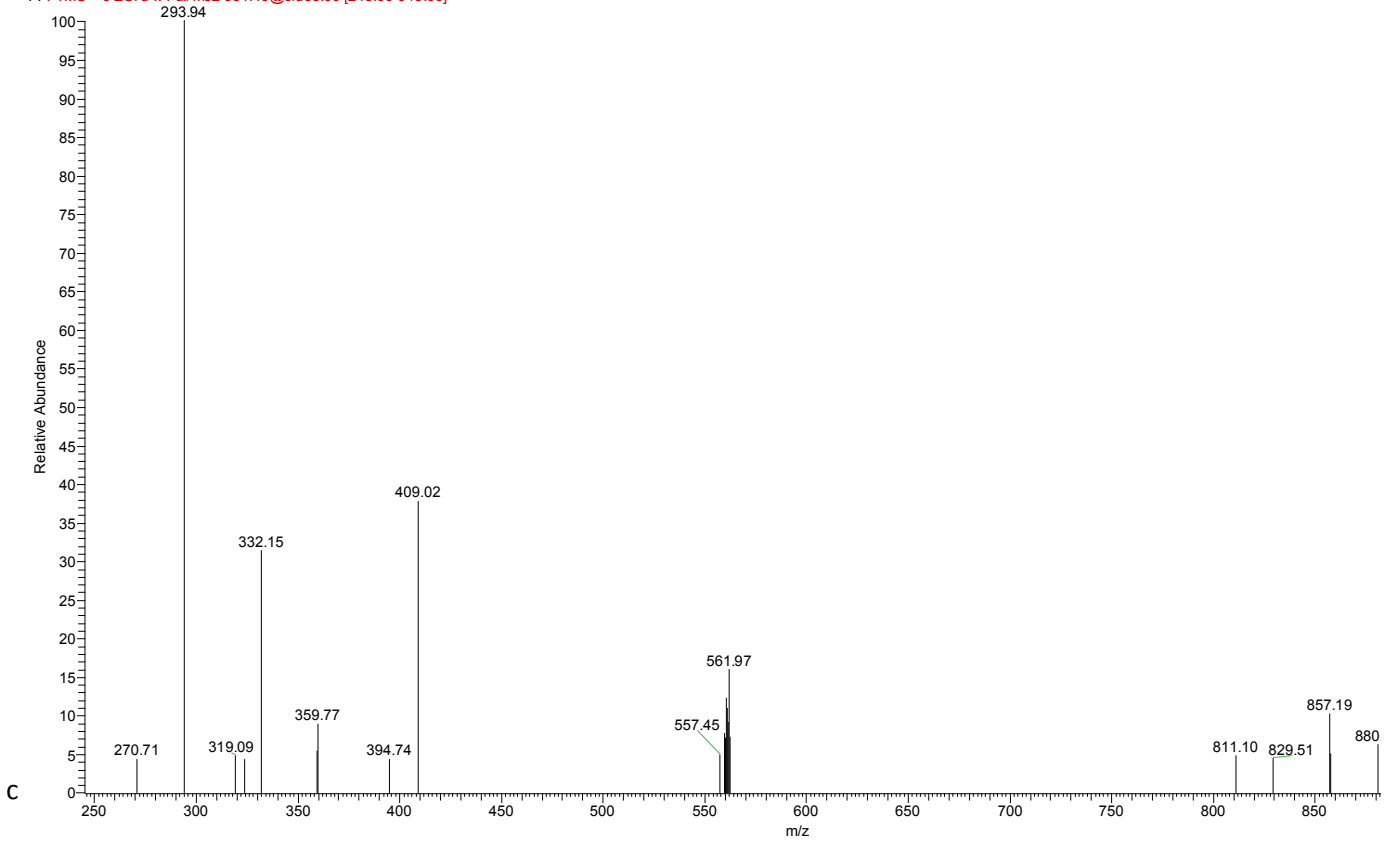

smpl\_15 #2602 RT: 34.87 AV: 1 NL: 6.19E4  
F: FTMS + c ESI d w Full ms2 987.55@cid35.00 [260.00-1000.00]

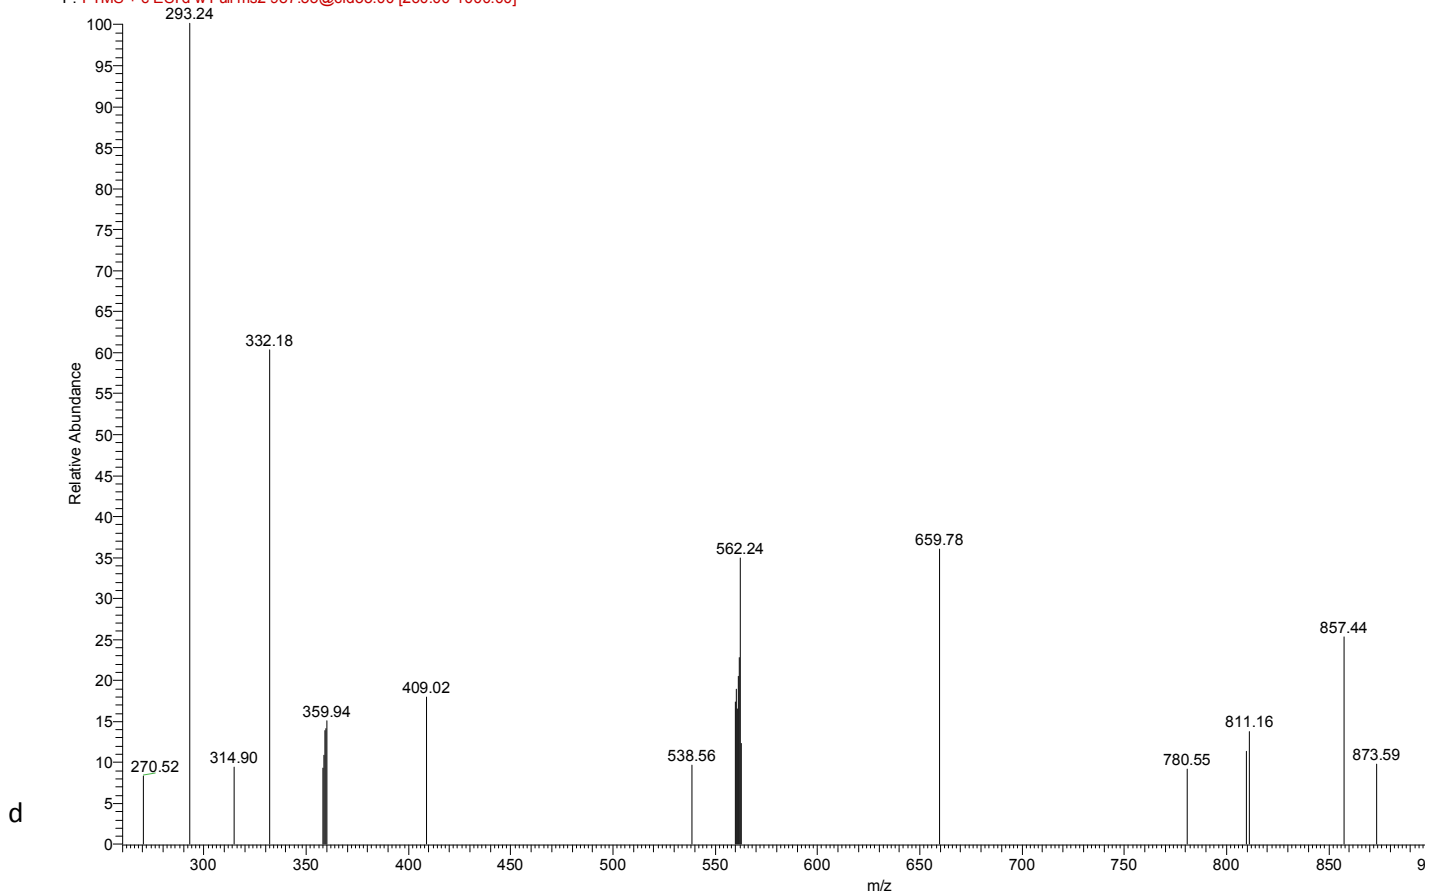

smpl\_15 #1586 RT: 22.52 AV: 1 NL: 2.34E5  
F: FTMS + c ESI d w Full ms2 333.20@cid35.00 [80.00-345.00]

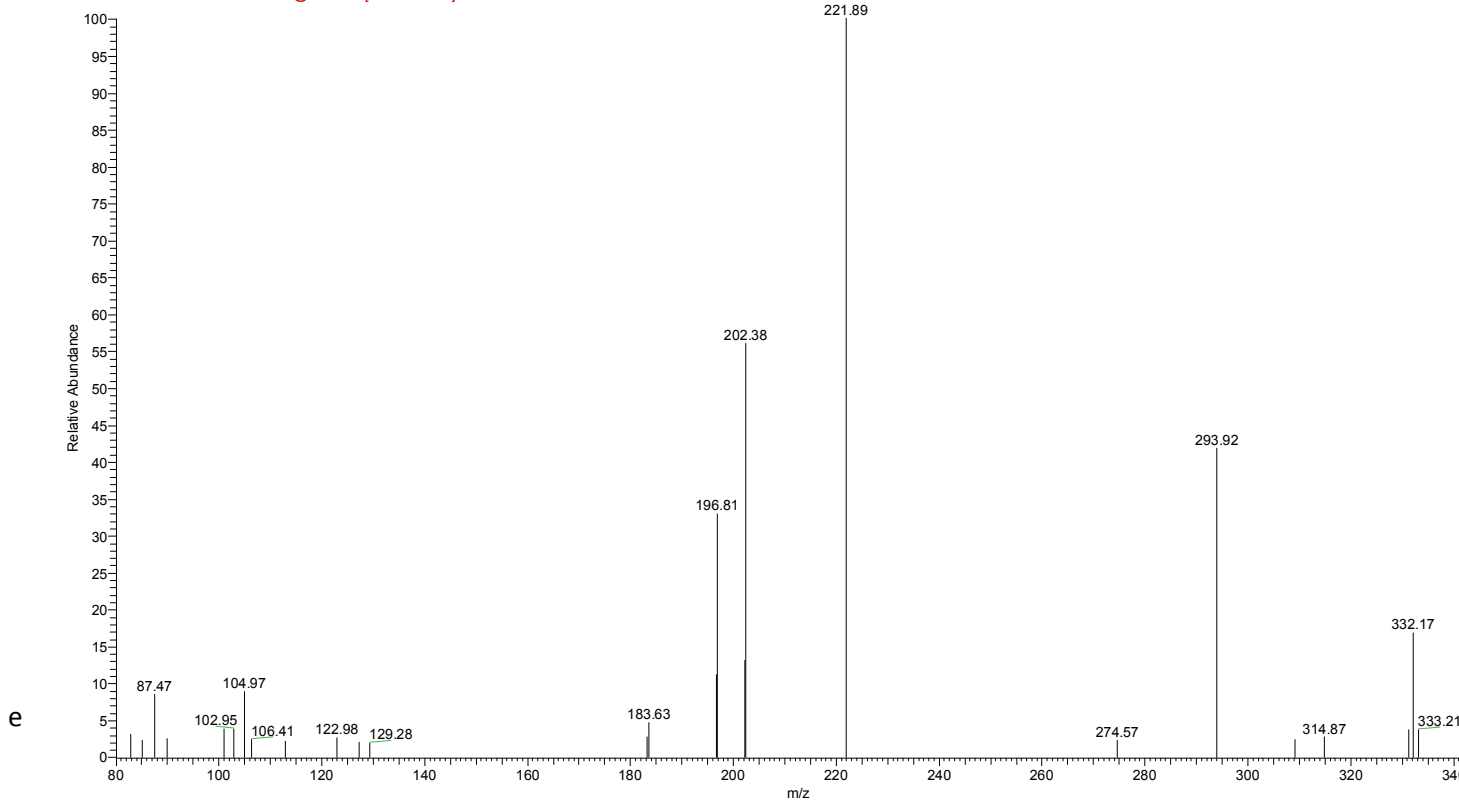

smpl\_16 #2206 RT: 30.64 AV: 1 NL: 1.13E5  
F: FTMS + c ESI d w Full ms2 960.52@cid35.00 [250.00-975.00]

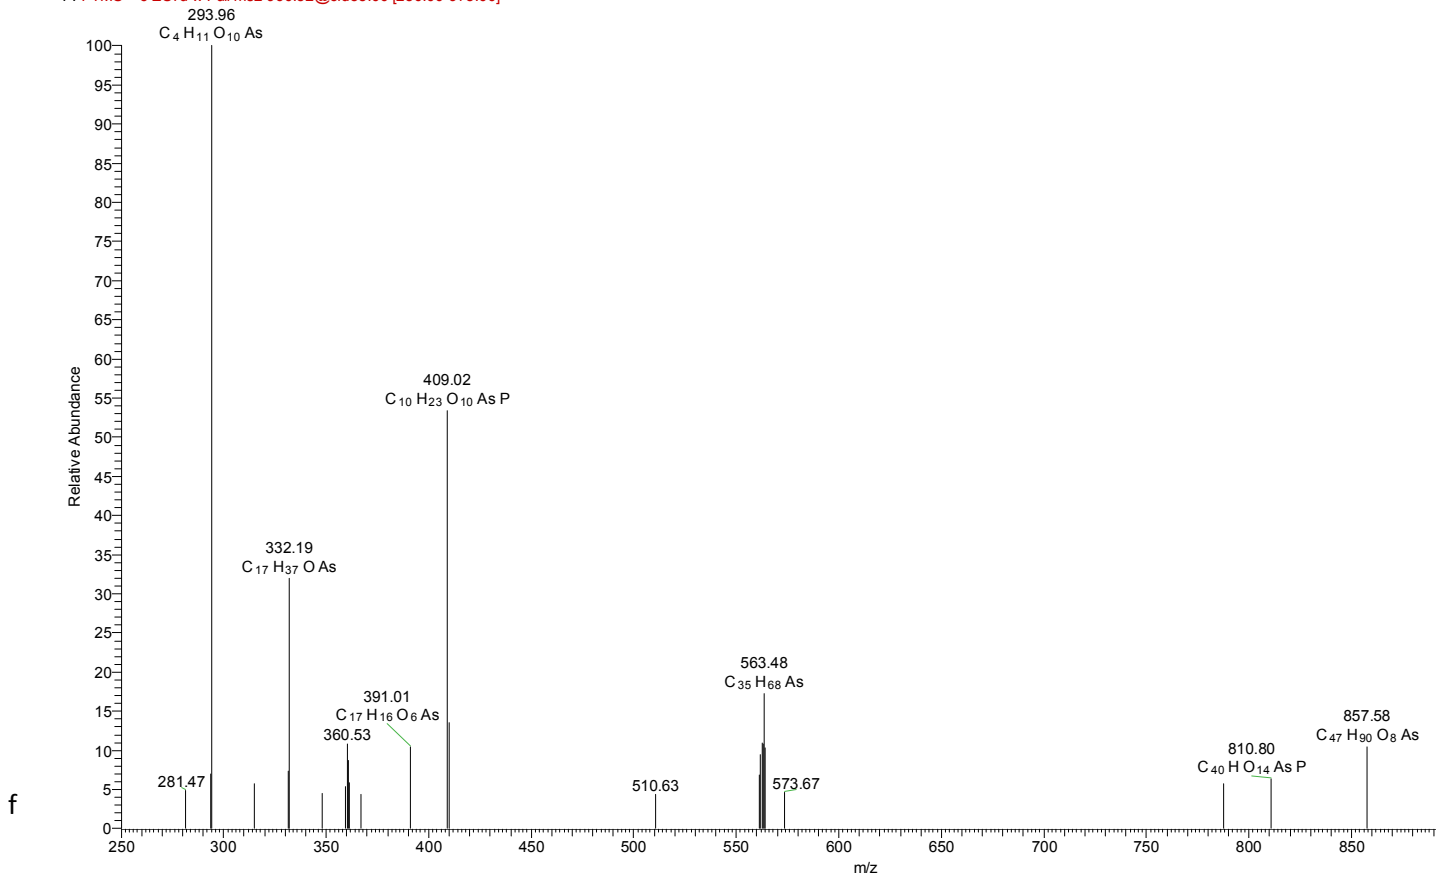

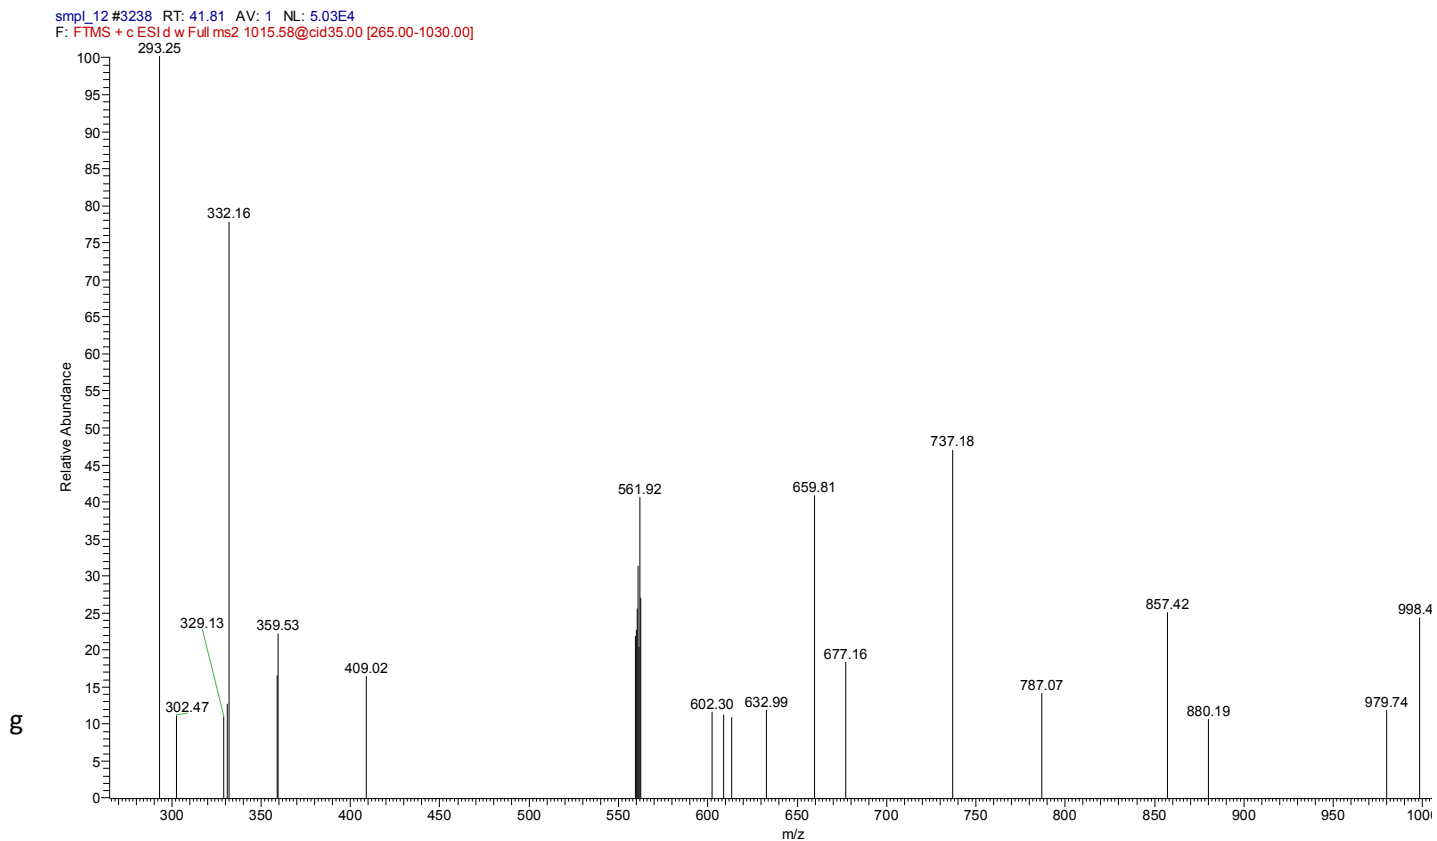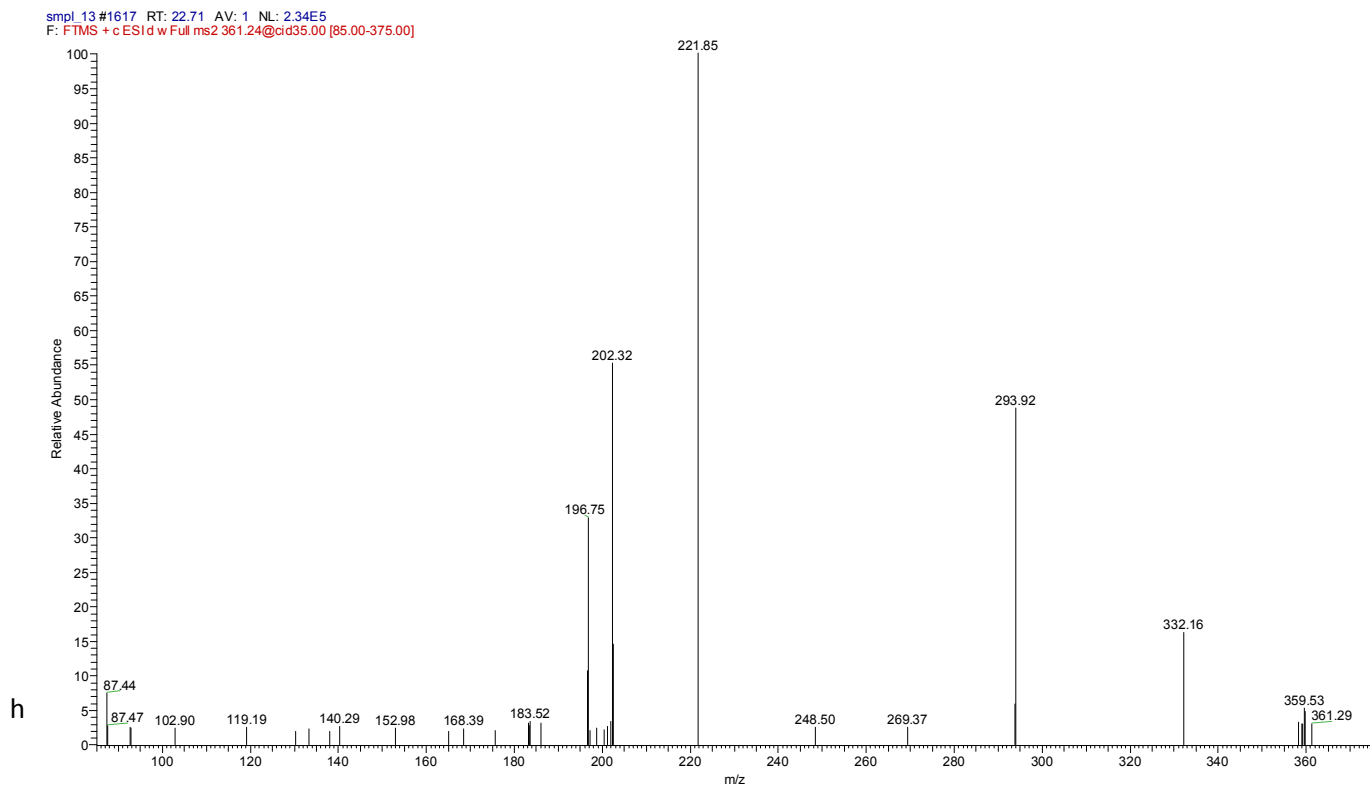

**Fig. S7** Example MSMS mass spectras for each species with MSMS. A) Smpl1 (959) – *Alaria esculenta* sporophyll, b) Smpl12 (1001) – *Saccharina latissima* old frond c) smpl12 (931), *S. latissima* old frond, d) Smpl15 (987) – *Hijiki*, e) smpl15 (333) *Hijiki*, f) Smpl16 (961) *Hijiki* g) Smpl12 (1015) *S. latissima* old frond h) Smpl14 (361) *S. latissima* Old frond

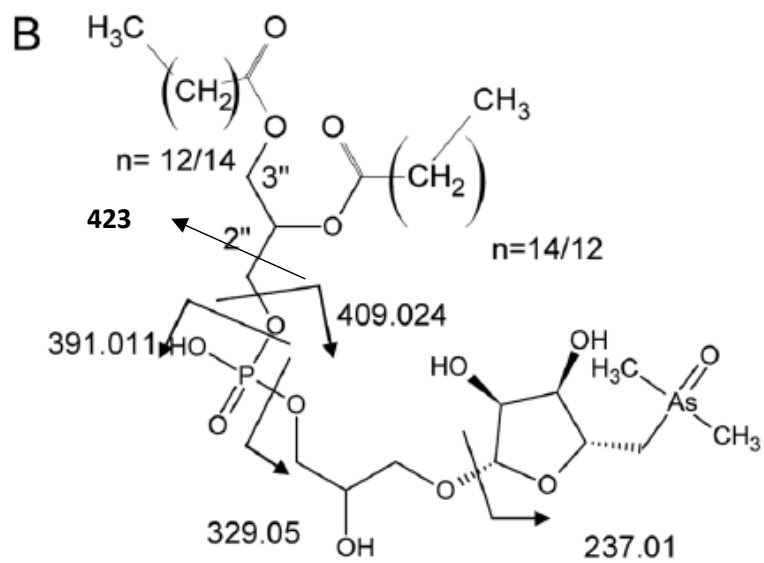

**Fig. S8** Figure adapted from Raab et al [3]. Fragments found here are similar, where the fragment with  $m/z$  423 fits the formula and pattern indicated here in red

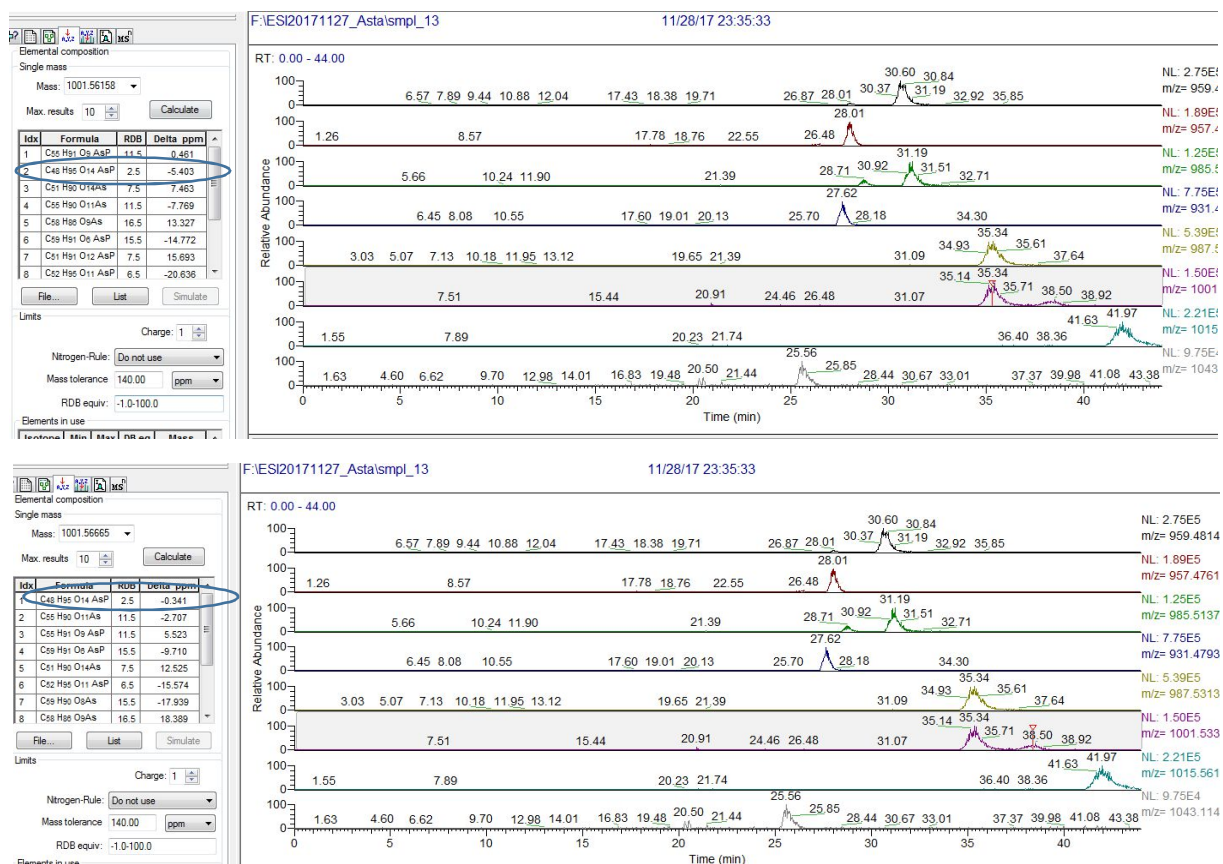



## Instability of AsPLs?

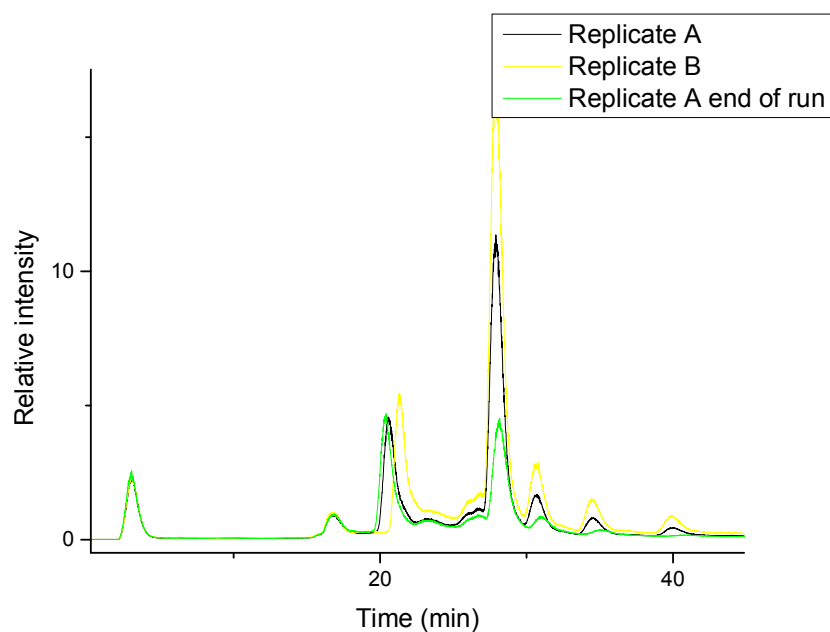

a)

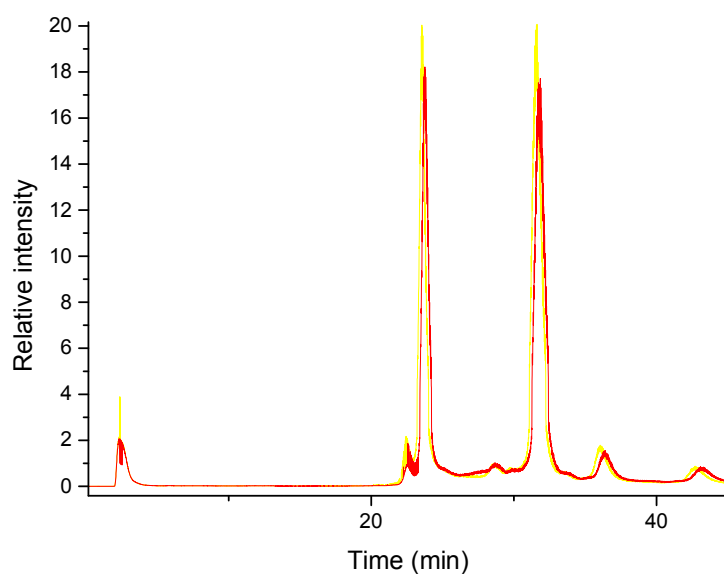

b)

**Fig. S9** a) Hijiki batch A b) Hijiki batch B

Replicates are similar for both batches (sample weighed into two separate vials and extracted). For the first batch, 1 replicate was re-analysed at the end of the run (approx. 22+ hours later), and it can be seen that the intensity is lower for AsPLs than it was before. The AsHCs and void peak are the same. It may indicate that the AsPLs may be rather unstable, which must be investigated in greater detail. However, since the peak at the void volume does not increase it is uncertain what has happened to the arsenic. For batch B, the Hijiki was only analysed at the end of the run, and the column recovery was acceptable.

## Comparison of the two extractions of the (same) samples

Some problems arose in Abdn with the measurement. There is a problem with automatic PA tuning when running in oxygen mode, **Fig. S11b**. By identifying the jump spot the data can be manually corrected, **Fig. S11c**.

### Alaria esculenta

The first few runs were under different HPLC settings. This resulted in a different elution for some *A. esculenta* samples. Hence, there were minor issues with quantification for the samples analysed in Abdn. Despite this, the data shows reasonably good comparison in the “pattern”, although higher concentrations of AsLs are found with the second batch (as described in manuscript).

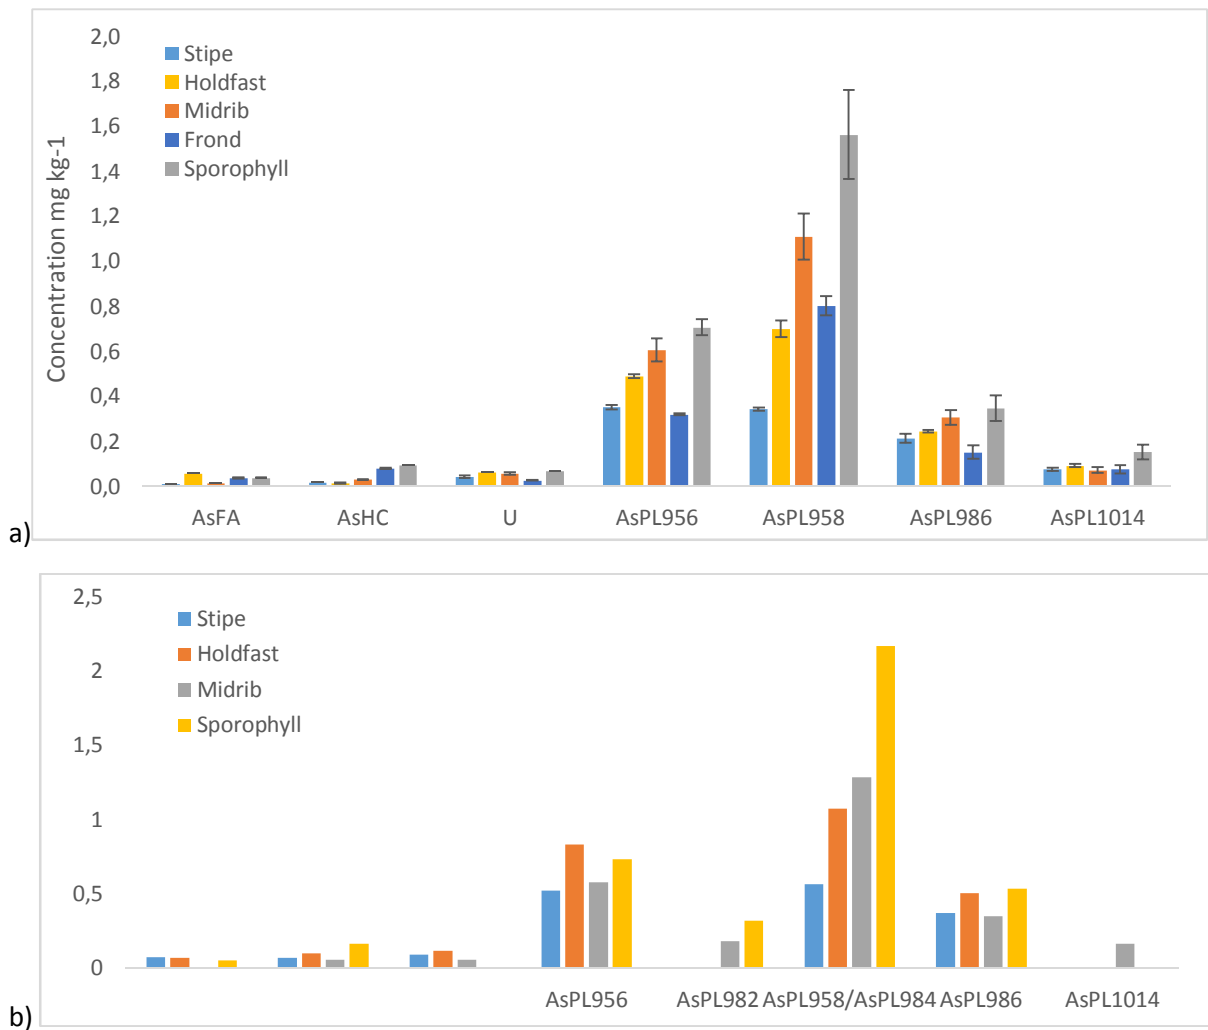

**Fig. S10** Samples of *Alaria esculenta*. A) Matis B) Abdn

Problems with *A. esculenta* samples at Abdn. Not analysed all with the same HPLC method, retention times very different. Graph strange for the frond (and excluded in quantification):

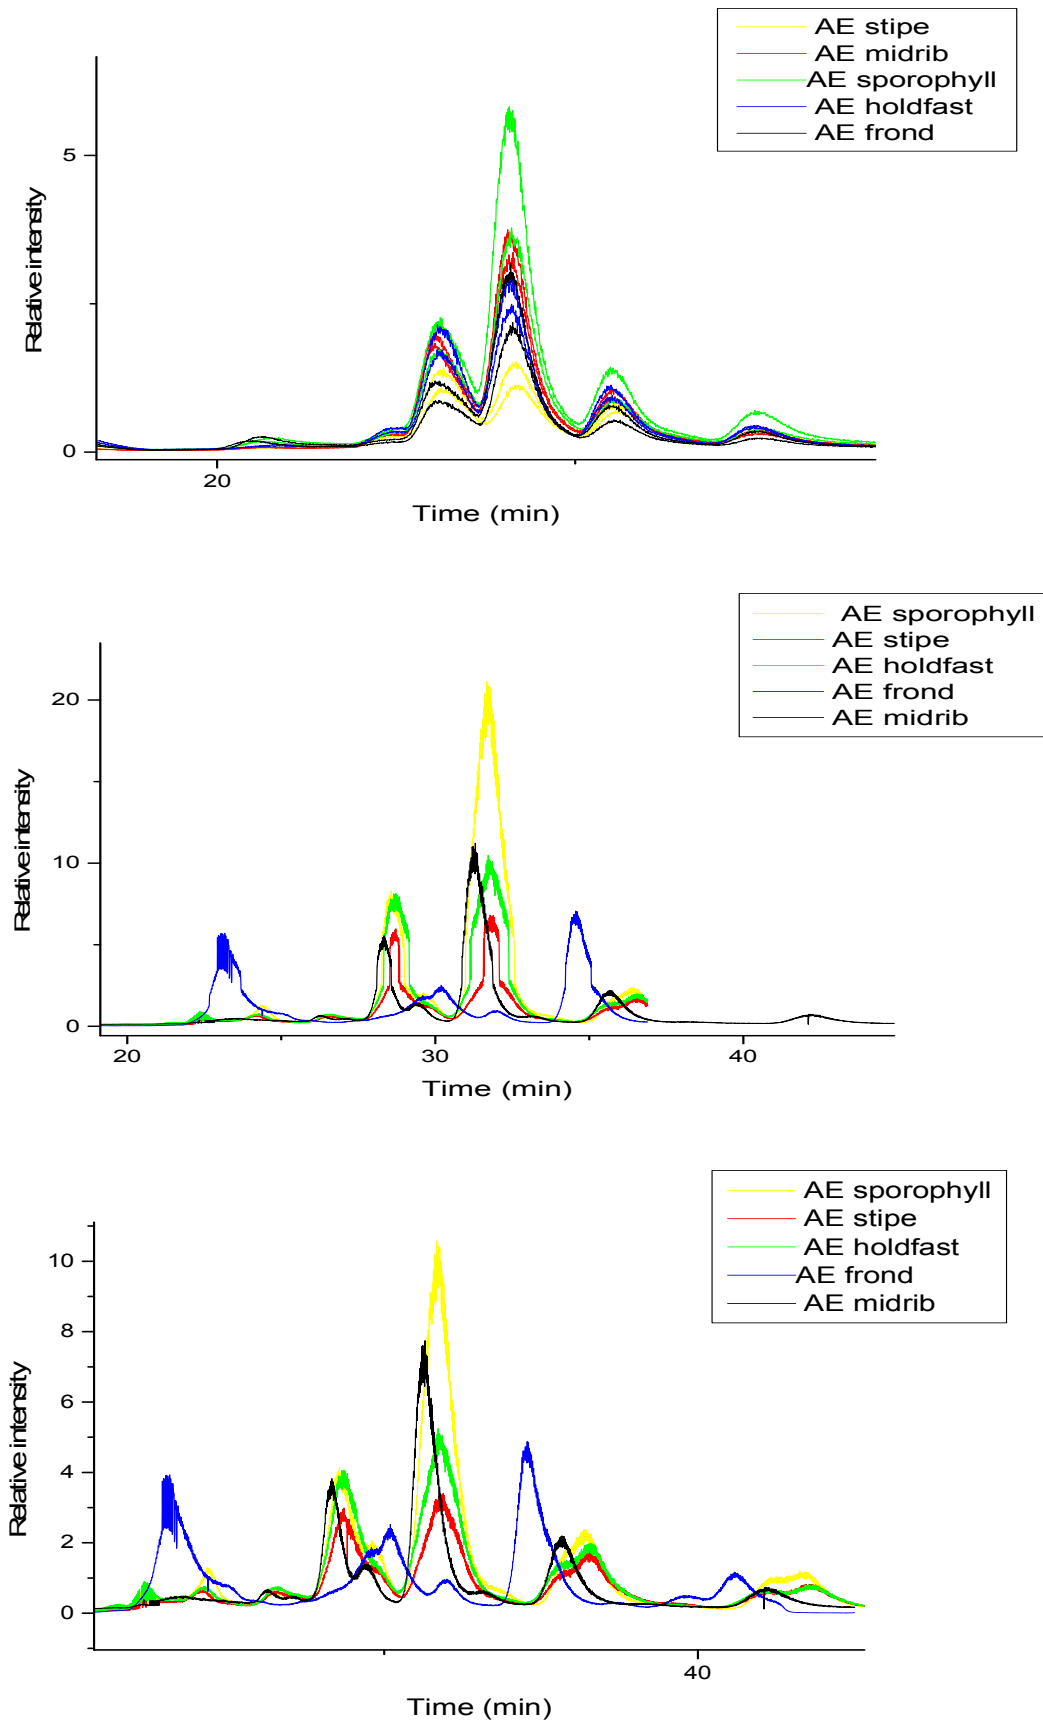

**Fig. S11** Samples of *Alaria esculenta* (AE) measured on HPLC-ICPMS A) Matís B) Abdn – prior to manual PA correction c) Abdn after manual PA correction

## Saccharina latissima

There was excellent reproducibility between the two batches. The increasing “trend” was seen again for the lighter AsPLs although it was a bit different for the heavier ones, **Fig. S12**. May that be due to quantification differences or potentially that there may be some instability in the dry seaweed for heavier AsPLs.

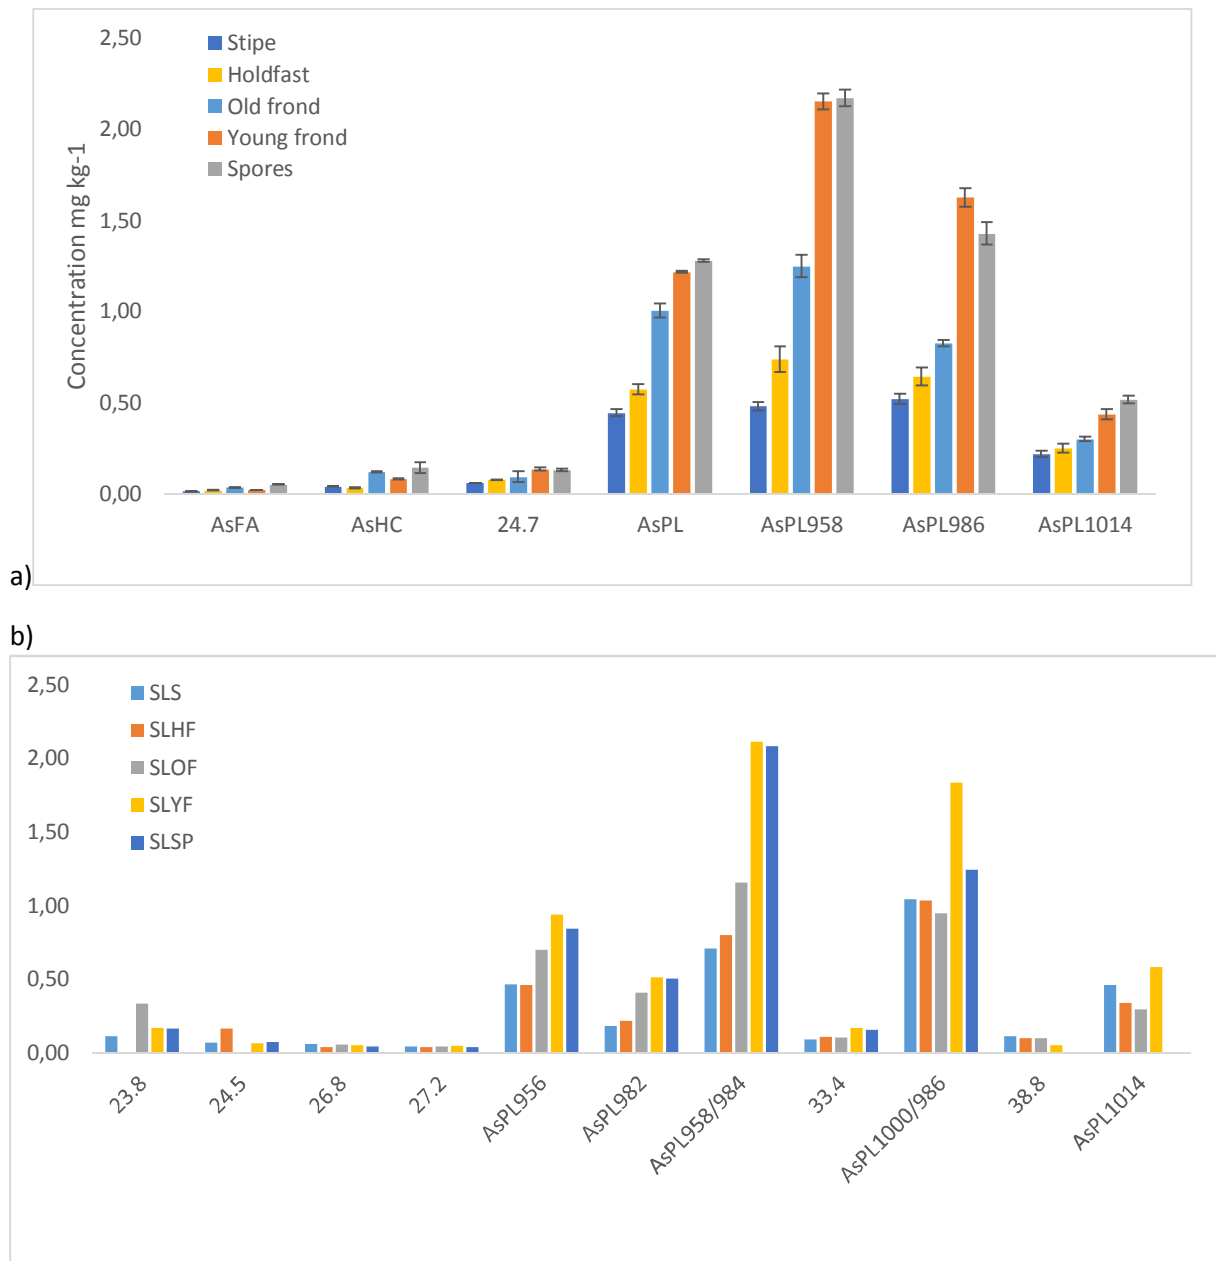

**Fig. S12** Samples of *Saccharina latissima* A) Matís B) Abdn

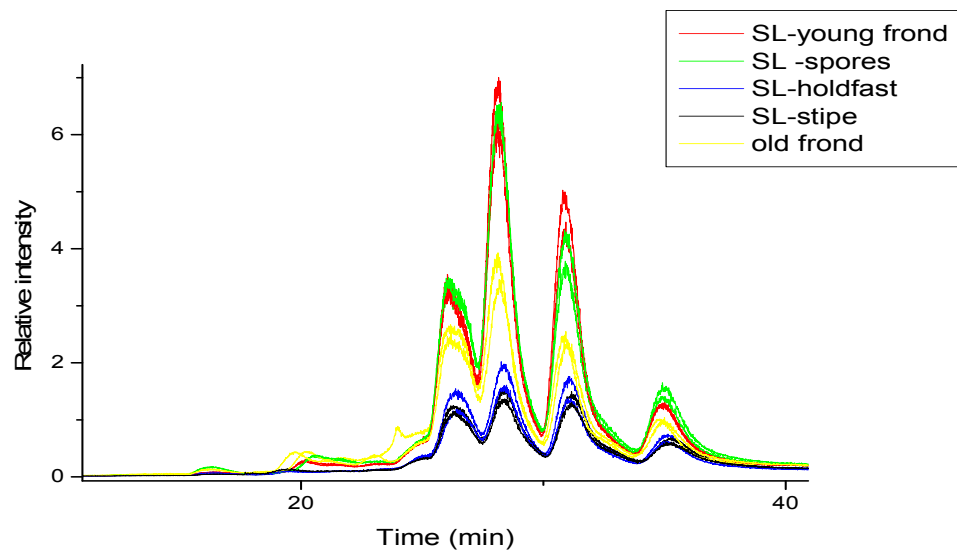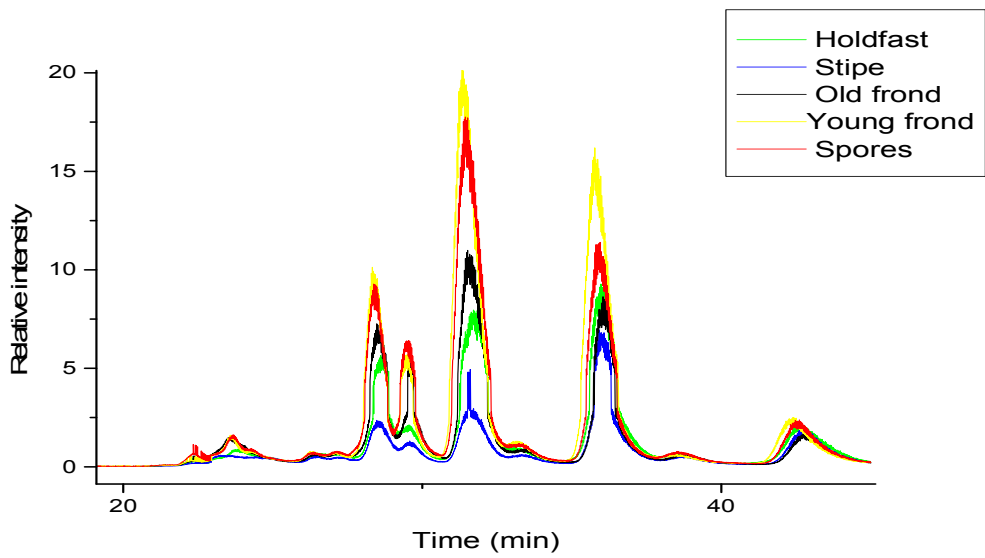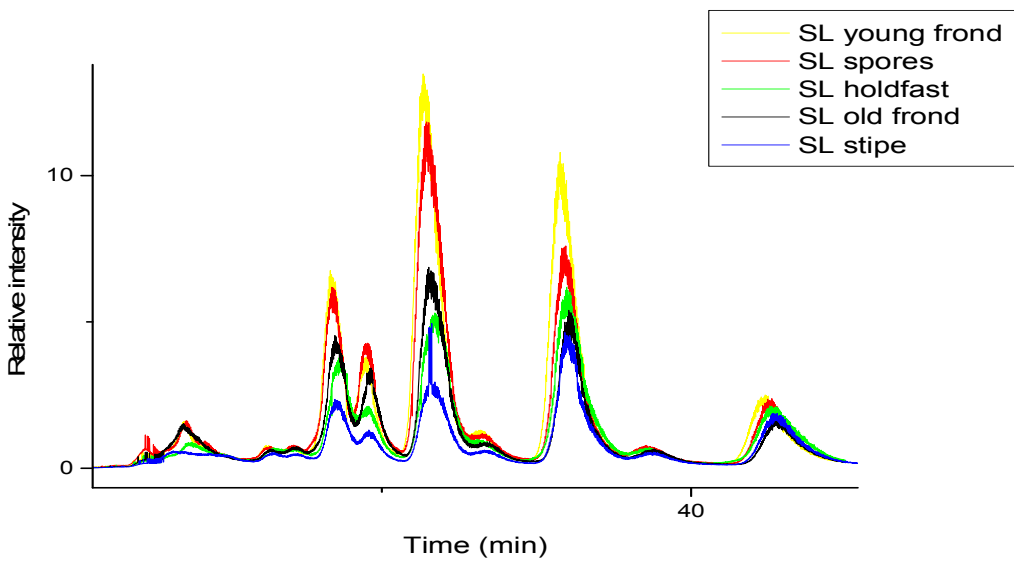

Fig. S13 Samples of *Saccharina latissima* A) Matís B) Abdn, prior to manual PA correction c) after PA correction

## Arsenosugars

**Table S4** Quantification of water soluble arsenic in *S. latissima*

|                      | Stipe       | Holdfast    | Old frond   | Young frond | Sori        |
|----------------------|-------------|-------------|-------------|-------------|-------------|
| AsSugOH              | 1.9 ± 0.2   | 2.59 ± 0.05 | 2.9 ± 0.1   | 3.6 ± 0.6   | 2.7 ± 0.8   |
| DMA                  | 0.09 ± 0.02 | 0.35 ± 0.01 | 0.35 ± 0.02 | 0.34 ± 0.04 | 0.29 ± 0.04 |
| AsSugPO <sub>4</sub> | 6.8 ± 1.1   | 13.2 ± 0.2  | 12.1 ± 0.9  | 10.1 ± 3.3  | 8.9 ± 1.2   |
| AsSugSO <sub>3</sub> | 18.2 ± 2.6  | 74.2 ± 1.0  | 60.7 ± 5.2  | 72.2 ± 9.8  | 53.9 ± 7.2  |
| U                    |             |             | 0.5 ± 0.07  | 0.7 ± 0.1   | 0.61 ± 0.04 |
| AsSugSO <sub>4</sub> |             |             | 0.37 ± 0.02 | 0.35 ± 0.18 | 0.30 ± 0.03 |

**Table S5** Quantification of water soluble arsenic in *A. esculenta*

|                      | Stipe       | Holdfast    | Midrib       | Frond       | Sporophyll   |
|----------------------|-------------|-------------|--------------|-------------|--------------|
| AsSugOH              | 0.28 ± 0.06 | 1.2 ± 0.05  | 1.3 ± 0.1    | 4.8 ± 1.0   | 1.48 ± 0.03  |
| DMA                  | 0.05 ± 0.07 | 0.14 ± 0.01 |              | 0.22 ± 0.02 | 0.05 ± 0.01  |
| AsSugPO <sub>4</sub> | 7.5 ± 0.8   | 9.7 ± 0.5   | 3.2 ± 0.1    | 7.1 ± 0.3   | 11.8 ± 0.1   |
| AsSugSO <sub>3</sub> | 19.7 ± 1.5  | 47.3 ± 2.3  | 18.7 ± 1.1   | 48.5 ± 0.6  | 46.6 ± 1.1   |
| U                    |             | 0.15 ± 0.07 |              | 0.38 ± 0.02 | 0.23 ± 0.04  |
| AsSugSO <sub>4</sub> | 0.08 ± 0.01 | 0.17 ± 0.03 | 0.01 ± 0.002 | 0.31 ± 0.01 | 0.11 ± 0.003 |

For *S. latissima* and *A. esculenta* As(III) would elute with AsSugOH and As(V) with AsSugSO<sub>4</sub> (as tested by spiking). Low quantities of iAs are expected.

**Table S6** Quantification of water soluble arsenic in Hijiki (n=3) in mg kg<sup>-1</sup>

|                            | Hijiki      | Reported in Wolle et al [4] |
|----------------------------|-------------|-----------------------------|
| AsSugOH+AsIII              | 0.42 ± 0.05 | 0.386 ± 0.014               |
| DMA                        | 0.62 ± 0.06 | 0.468 ± 0.023               |
| AsSugPO <sub>4</sub>       | 1.5 ± 0.1   | 1.113 ± 0.029               |
| AsSugSO <sub>3</sub>       | 1.1 ± 0.1   | 0.546 ± 0.041               |
| AsSugSO <sub>4</sub> + AsV | 14.6 ± 1.2  | 12.3 ± 0.1                  |

## References

- [1] R.A. Glabonjat, G. Raber, K.B. Jensen, J. Ehgartner, K.A. Francesconi, Quantification of Arsenolipids in the Certified Reference Material NMIJ 7405-a (Hijiki) using HPLC/Mass Spectrometry after Chemical Derivatization, *Anal Chem*, 86 (2014) 10282-10287.
- [2] A.H. Petursdottir, J. Rodrigues de Jesus, H. Gunnlaugsdottir, J. Feldmann, Quantification of labile and stable non-polar arsenolipids in commercial fish meals and edible seaweed samples, *Journal of Analytical Atomic Spectrometry*, 33 (2018) 102-110.
- [3] A. Raab, C. Newcombe, D. Pitton, R. Ebel, J. Feldmann, Comprehensive Analysis of Lipophilic Arsenic Species in a Brown Alga (*Saccharina latissima*), *Analytical Chemistry*, 85 (2013) 2817-2824.
- [4] M.M. Wolle, S.D. Conklin, Speciation analysis of arsenic in seafood and seaweed: Part II-single laboratory validation of method, *Anal Bioanal Chem*, 410 (2018) 5689-5702.
